# Supplementary material for: Single dose moxidectin versus ivermectin for Onchocerca volvulus infection in Ghana, Liberia, and the Democratic Republic of the Congo: a randomised, controlled, double-blind phase 3 trial
Source: PubMed Central journal article supplement (PMC6172290; doi:10.1016/s0140-6736(17)32844-1), 2018-10-06
Supplement: mmc1.pdf [file mmc1.pdf]

# THE LANCET

## Supplementary appendix

This appendix formed part of the original submission and has been peer reviewed. We post it as supplied by the authors.

Supplement to: Opoku NO, Bakajika DK, Kanza EM, et al. Single dose moxidectin versus ivermectin for *Onchocerca volvulus* infection in Ghana, Liberia, and the Democratic Republic of the Congo: a randomised, controlled, double-blind phase 3 trial. *Lancet* 2018; published online Jan 17. [http://dx.doi.org/10.1016/S0140-6736\(17\)32844-1](http://dx.doi.org/10.1016/S0140-6736(17)32844-1).

## Supplemental Appendix

To: Opoku et al. Single dose moxidectin versus ivermectin for *Onchocerca volvulus* infection in Ghana, Liberia, and the Democratic Republic of the Congo: a randomised, controlled, double-blind phase 3 trial

### Contents

|       |                                                                                                                                                                                             |    |
|-------|---------------------------------------------------------------------------------------------------------------------------------------------------------------------------------------------|----|
| 1     | Methods                                                                                                                                                                                     | 3  |
| 1.1   | Eligibility criteria                                                                                                                                                                        | 3  |
| 1.1.1 | Inclusion Criteria                                                                                                                                                                          | 3  |
| 1.1.2 | Exclusion Criteria                                                                                                                                                                          | 3  |
| 1.2   | Overview of examinations conducted                                                                                                                                                          | 3  |
|       | Table S 1: Type and timing of examinations conducted                                                                                                                                        | 3  |
| 1.3   | Onchocerciasis Chemotherapy Research Centre (OCRC) and other protocol specified adverse event grading criteria                                                                              | 4  |
|       | Table S 2: Onchocerciasis Chemotherapy Research Centre Criteria (OCRC-C)                                                                                                                    | 5  |
|       | Table S 3: Grading of visual fields abnormalities measured via FDT perimetry                                                                                                                | 12 |
|       | Table S 4: Grading of colour vision with PV16                                                                                                                                               | 12 |
|       | Table S 5: Grading of laboratory events not included in other grading scales provided                                                                                                       | 12 |
| 1.4   | Mazzotti reactions                                                                                                                                                                          | 12 |
| 1.4.1 | Overview of Mazzotti reactions                                                                                                                                                              | 12 |
| 1.4.2 | Coding of adverse events characterized as Mazzotti reactions                                                                                                                                | 13 |
|       | Table S 6: Dictionary for coding signs and symptoms of onchocerciasis and AEs characterized as Mazzotti reactions into reaction clusters and groups                                         | 13 |
| 1.5   | Sample size calculation                                                                                                                                                                     | 14 |
| 1.6   | Statistical analysis                                                                                                                                                                        | 15 |
| 1.6.1 | Statistical methods for primary efficacy endpoint                                                                                                                                           | 15 |
| 1.6.2 | Analysis populations                                                                                                                                                                        | 15 |
| 1.7   | Overview of protocol amendments                                                                                                                                                             | 15 |
| 2     | Results                                                                                                                                                                                     | 16 |
| 2.1   | Baseline characteristics                                                                                                                                                                    | 16 |
| 2.1.1 | Skin microfilariae                                                                                                                                                                          | 16 |
|       | Table S 7: Skin microfilariae density in subgroups defined by level of infection at baseline and presence of palpable nodules pre-treatment                                                 | 16 |
|       | Figure S 1 A: Number of nodules palpated pre-treatment vs pre-treatment skin microfilariae density by sex of participants; B: Participant age vs. number of palpable nodules pre-treatment. | 16 |
|       | Figure S 2 Skin microfilariae density pre-treatment by age and sex                                                                                                                          | 17 |
| 2.1.2 | Results of ICT testing pre-treatment                                                                                                                                                        | 17 |
| 2.1.3 | Intestinal helminth infection pre-treatment                                                                                                                                                 | 17 |
|       | Table S 8: Intestinal helminth infections at baseline by site                                                                                                                               | 17 |
| 2.2   | Efficacy data                                                                                                                                                                               | 18 |
| 2.2.1 | Primary efficacy endpoint (SmfD 12 months post-treatment) analysis with protocol-specified mixed effects model                                                                              | 18 |
|       | Table S 9: Primary efficacy endpoint: Descriptive statistics and protocol-specified mixed-effects model analysis                                                                            | 18 |
| 2.2.2 | Protocol-planned non-parametric analysis of primary efficacy endpoint (SmfD 12 months post-treatment)                                                                                       | 19 |
| 2.2.3 | Sensitivity analysis of primary efficacy endpoint in response to statistical peer review: Fixed effects model                                                                               | 19 |
|       | Table S 10: Primary efficacy endpoint: Fixed effects model sensitivity analysis output                                                                                                      | 19 |

|       |                                                                                                                                                                                                                                                                                                                        |    |
|-------|------------------------------------------------------------------------------------------------------------------------------------------------------------------------------------------------------------------------------------------------------------------------------------------------------------------------|----|
| 2.2.4 | Sensitivity analysis in response to statistical peer review: Descriptive statistics and linear mixed model of percentage SmfD change from baseline at month 12                                                                                                                                                         | 19 |
|       | Table S 11: Descriptive statistics and linear mixed model analysis output for percentage SmfD change from baseline at month 12                                                                                                                                                                                         | 19 |
| 2.2.5 | Secondary efficacy endpoints                                                                                                                                                                                                                                                                                           | 20 |
|       | Table S 12: Skin microfilariae density 1, 6, 12 and 18 months after treatment: Descriptive statistics and mixed effects model output                                                                                                                                                                                   | 20 |
|       | Table S 13: Percentage SmfD change from baseline of skin microfilariae density 1, 6, 12 and 18 months after treatment: Descriptive statistics                                                                                                                                                                          | 20 |
|       | Table S 14: Proportion (%) of participants with undetectable levels of skin microfilariae 1, 6, 12 and 18 months after treatment: Descriptive statistics and adjusted odds ratios                                                                                                                                      | 21 |
|       | Figure S 3 Percentage of participants with 1, 6, and 12 months follow up data treated with ivermectin (A, C, n=478) and moxidectin (B, D, n=938) by minimum (A, B) and maximum (C, D) skin microfilariae densities between 1 and 12 months in percent of pre-treatment skin microfilariae density                      | 21 |
|       | Table S 15: Microfilariae levels in the anterior chamber 12 months post treatment among participants with > 10 mf across both anterior chambers at baseline and Month 12 data for both eyes: Descriptive statistics                                                                                                    | 22 |
|       | Table S 16: Reduction (%) from baseline of microfilariae levels in the anterior chamber 12 months post treatment among participants with > 10 mf across both anterior chambers at baseline and Month 12 data for both eyes): Descriptive statistics and model output                                                   | 22 |
| 2.3   | Safety data                                                                                                                                                                                                                                                                                                            | 22 |
| 2.3.1 | Serious Adverse Events                                                                                                                                                                                                                                                                                                 | 22 |
|       | Table S 17: Serious adverse events (SAEs) during the first 6 months post treatment (MedDRA coding)                                                                                                                                                                                                                     | 22 |
| 2.3.2 | Adverse events reported as resulting in Death (MedDRA coding)                                                                                                                                                                                                                                                          | 23 |
|       | Table S 18: Narratives generated from SAE reports for AEs with outcome death                                                                                                                                                                                                                                           | 23 |
| 2.3.3 | Dependency of Mazzotti reactions on pre-treatment skin microfilariae density                                                                                                                                                                                                                                           | 25 |
|       | Figure S 4 Percentage of participants overall and by skin microfilariae density pre-treatment with at least one MAZ of any grade and by highest grade experienced. (A) Any type of MAZ, (B) any type of clinical MAZ, (C) any type of ocular MAZ, (D) any type of haematological MAZ, (E) any type of biochemical MAZ. | 25 |
|       | Figure S 5 Percentage of participants overall and by intensity of infection pre-treatment with at least one clinical MAZ of any grade and by highest grade experienced for the specified clinical MAZ group.                                                                                                           | 26 |
|       | Figure S 6 Percentage of participants overall and by intensity of infection pre-treatment with the specified hematological or serum biochemical MAZ by highest grade experienced                                                                                                                                       | 27 |
|       | Figure S 7 Percentage of participants overall and by intensity of infection pre-treatment with the specified types of ocular MAZ of any grade and by highest grade experienced                                                                                                                                         | 28 |
| 2.4   | Exploratory endpoint: Effect on intestinal helminths                                                                                                                                                                                                                                                                   | 29 |
|       | Table S 19: Cure rate and egg reduction rate across all sites for hookworm, roundworm and whipworm                                                                                                                                                                                                                     | 29 |
|       | Figure S 8 Individual data based analysis of response of hookworm infection to moxidectin and ivermectin                                                                                                                                                                                                               | 29 |
| 3     | Classification of Response to ivermectin in previous studies                                                                                                                                                                                                                                                           | 29 |
|       | Table S 20: Criteria in previous studies for classification of response to ivermectin treatment based on skin microfilariae levels                                                                                                                                                                                     | 30 |
| 4     | References                                                                                                                                                                                                                                                                                                             | 30 |

## 1 Methods

### 1.1 Eligibility criteria

Eligibility criteria were designed to include a population as close to a potential mass treatment population as possible without subjecting participants to higher than necessary unknown risks (exclusion of <12 years in absence of paediatric PK data, pregnant or breastfeeding women, *Loa loa* co-infection (study areas were not loiasis endemic)), compromising efficacy assessment (exclusion of people with anti-nematodal treatment in last 6 months and plans to move out of the area), confounding adverse event (AE) causality assessment (exclusion of people with acute or uncontrolled disease in the 7 days pre-treatment, treated with an investigational drug or device in the 4 weeks before study drug administration, with lymphatic filariasis (LF) microfilaremia > 100 mf/ml).

#### 1.1.1 Inclusion Criteria

- Male or female subjects  $\geq 12$  years of age and weighing  $\geq 30$  kg.
- Subjects with *Onchocerca volvulus* infection, at least 10 microfilariae/mg by skin snip.
- All female subjects not surgically sterile or postmenopausal had to commit to the use of a reliable method of birth control for 6 months after study drug administration. (Birth control devices / drugs chosen by the woman - and partner, if applicable - was provided by the study)

#### 1.1.2 Exclusion Criteria

- Treatment with the anti-nematodal drugs diethylcarbamazine [DEC], suramin, ivermectin, albendazole or levamisole, within 6 months before planned study drug administration.
- Pregnant or breastfeeding women.
- Low probability of residency in the area (based on subject's assessment) over the 20 months following the anticipated date of study drug administration.
- Subjects with loiasis.
- Subjects with lymphatic filariasis (LF) with an intensity of infection >100 mf/mL.
- Acute or uncontrolled disease process (e.g., acute pneumonia requiring therapy or end stage AIDS) within 7 days before study drug administration. Patients with stable chronic diseases (e.g., no change in medication for past month) were permitted.
- Any investigational drugs or investigational devices within 4 weeks before study drug administration that may confound safety and/or efficacy assessments.
- Known or suspected allergy to moxidectin or ivermectin or other compounds related to these classes of medication.
- Any concomitant condition that, in the opinion of the investigator, would preclude an evaluation of a response or would place subject's health at undue risk.

### 1.2 Overview of examinations conducted

**Table S 1: Type and timing of examinations conducted**

|                                       | Screening/<br>Baseline <sup>9</sup> | D1 | D2-4   | D6<br>( $\pm 1D$ ) | D14<br>( $\pm 2D$ ) | M1<br>( $\pm 5D$ ) | M3<br>( $\pm 0.5M$ ) | M6<br>( $\pm 1M$ ) | M12<br>( $\pm 1M$ ) | M18<br>( $\pm 2M$ ) |
|---------------------------------------|-------------------------------------|----|--------|--------------------|---------------------|--------------------|----------------------|--------------------|---------------------|---------------------|
| <b>Safety</b>                         |                                     |    |        |                    |                     |                    |                      |                    |                     |                     |
| Weight                                | X                                   |    |        |                    |                     | X                  | X                    | X                  |                     |                     |
| Physical examination <sup>1</sup>     | X                                   | X  | X      | X                  | X                   | X                  | X                    | X                  | X                   | X                   |
| Vital signs <sup>2</sup>              | X                                   | X  | X      | X                  | X                   | X                  | X                    | X                  | X                   | X                   |
| 12 lead ECG                           | X                                   |    | 2 or 3 |                    |                     |                    |                      |                    |                     |                     |
| Ocular Examination <sup>3</sup>       | X                                   |    | 3 or 4 |                    |                     | X                  |                      | X                  | X                   | X                   |
| Laboratory examination <sup>4</sup>   | X                                   |    |        | X                  | X                   | X                  | X                    | X                  |                     |                     |
| <i>Loa loa</i> screening <sup>5</sup> | X                                   |    |        |                    |                     |                    |                      |                    |                     |                     |
| Questioning                           | X                                   | X  | X      | X                  | X                   | X                  | X                    | X                  | X                   | X                   |
| <b>Efficacy</b>                       |                                     |    |        |                    |                     |                    |                      |                    |                     |                     |
| Skin snips <sup>6</sup>               | X                                   |    |        |                    |                     | X                  |                      | X                  | X                   | X                   |
| Ocular examination <sup>3</sup>       | X                                   |    | 3 or 4 |                    |                     | X                  |                      | X                  | X                   | X                   |
| <b>Co-infections</b>                  |                                     |    |        |                    |                     |                    |                      |                    |                     |                     |
| Kato-Katz <sup>7</sup>                | X                                   |    |        |                    |                     | X                  |                      |                    |                     |                     |
| Lymphatic filariasis <sup>8</sup>     | X                                   |    |        |                    |                     |                    |                      |                    | X                   | X                   |

D: Day, M: Month. X indicates examination at each follow-up indicated in the top row, numbers indicate the day for performing the examination.

- 1 Physical examination including neurological examination. Subcutaneous nodule palpation was conducted at screening and Month 12 and 18.
- 2 Vital signs including temperature, respiratory rate, pulse rate (PR) and blood pressure (BP) after at least 5 minutes supine. Up to Month 1, PR and BP measurement were repeated after 2 minutes standing following  $\geq$  5 minutes supine at baseline. Day 1: once before and once after drug administration.
- 3 Ocular Examination included visual acuity (Snellen E), visual fields (FDT perimetry), colour vision (PV16 colour vision test), intraocular pressure, examination of the fundus, slit lamp examination of anterior segment, counting of microfilariae in anterior chamber, living and dead microfilariae in cornea and punctate opacities.
- 4 Laboratory evaluations included: serum biochemistry ( $\text{Na}^+$ ,  $\text{K}^+$ ,  $\text{Cl}^-$ , glucose, total protein, albumin, urea, creatinine, alkaline phosphatase, lactic dehydrogenase, total bilirubin, gamma-glutamyl transpeptidase, aspartate aminotransferase, and alanine aminotransferase), haematology (complete blood cell count, haematocrit, haemoglobin, 5-part differential white blood cell count, platelet count), dipstick semiquantitative urinalysis (specific gravity, pH, albumin (protein), glucose, ketones, haemoglobin, bilirubin, urobilinogen, nitrite and leukocyte esterase). Microscopic evaluation of the urine for red and white blood cells, epithelial cells, bacteria, casts, and crystals was performed at baseline and thereafter only at investigator's discretion as medically indicated.
- 5 Study sites were selected for lack of *Loa loa* endemicity. Testing for loiasis infection was conducted in the two sites in DRC since potential study participants might have lived in a loiasis endemic area during the preceding civil conflict. Blood was collected between approximately 11:00 and 14:00 by finger prick with a 60  $\mu\text{L}$  non-heparinized capillary tube. The blood was spread on a slide, dried, Giemsa stained and dried at ambient temperature. *Loa loa* microfilariae were counted at a magnification of 100.
- 6 Minimum of 1 mg from each iliac crest and calf with a 2 mm corneoscleral Holth punch, incubated individually in physiological saline for at least 8 hours.
- 7 Single sample Kato Katz for intestinal helminths. Follow up sample obtained only in those infected pre-treatment.
8. Lymphatic filariasis (LF) evaluation in areas coendemic for LF or where endemicity is unknown. Pretreatment: immunochromatographic card test for *Wuchereria bancrofti* (ICT) in subjects without clinical signs and symptoms. Nightblood examination for microfilaria for ICT positive and all subjects with signs and symptoms of LF. Post-treatment LF evaluation via nightblood evaluation only in subjects positive at baseline; ICT at Month 12 in subjects with positive baseline ICT (with microfilaraemia testing if positive at baseline); ICT at Month 18 in subjects with positive Month 12 ICT (with microfilaraemia testing if ICT-positive at Month 18).
- 9 Skin snips for eligibility assessment were obtained in the village up to 60 days before study drug administration. All other examinations for eligibility assessment and determination of baseline status were done on days -3 to -1 in the study centre.

### 1.3 Onchocerciasis Chemotherapy Research Centre (OCRC) and other protocol specified adverse event grading criteria

Table S 2, Table S 3, Table S 4 and Table S 5 show the OCRC grading criteria as well as other protocol specified criteria for protocol-specified methods and laboratory values not included in the OCRC grading criteria or the NCI CTC v 2.0 criteria

([http://ctep.cancer.gov/protocolDevelopment/electronic\\_applications/ctc.htm](http://ctep.cancer.gov/protocolDevelopment/electronic_applications/ctc.htm)).

**Table S 2: Onchocerciasis Chemotherapy Research Centre Criteria (OCRC-C)**

| Sign/Symptom                                                                                                                                                                                                                | Grade 0 | Grade 1                                  | Grade 2                                                     | Grade 3                                                                                                     | Grade 4                                                                                                                 |
|-----------------------------------------------------------------------------------------------------------------------------------------------------------------------------------------------------------------------------|---------|------------------------------------------|-------------------------------------------------------------|-------------------------------------------------------------------------------------------------------------|-------------------------------------------------------------------------------------------------------------------------|
| <b>MAZZOTTI REACTION CRITERIA - SYSTEMIC REACTIONS (1)</b>                                                                                                                                                                  |         |                                          |                                                             |                                                                                                             |                                                                                                                         |
| Itching                                                                                                                                                                                                                     | None    | Mild                                     | Moderate or 'Severe' but with only occasional scratching    | 'Severe' and with fairly vigorous scratching "Windmill Effect"                                              | 'Severe' and with restlessness, agitation, loss of epithelium or prolonged vigorous scratching                          |
| Note: 'Severe' is patient's perception of grade of discomfort. "Windmill Effect" = arms in fairly continuous motion with scratching                                                                                         |         |                                          |                                                             |                                                                                                             |                                                                                                                         |
| Headache                                                                                                                                                                                                                    | None    | Mild                                     | Moderate or 'Severe' but patient comfortable                | 'Severe' and with obvious distress                                                                          | Unbearable                                                                                                              |
| Note: 'Severe' is patient's perception of grade of discomfort                                                                                                                                                               |         |                                          |                                                             |                                                                                                             |                                                                                                                         |
| Joint pain (arthralgia)                                                                                                                                                                                                     | None    | Mild                                     | Moderate or 'Severe' but without change in gait or function | 'Severe' and with a definite limp or change in function due to joint pain                                   | 'Severe' and with marked interference with motion or function (commonly "Pillar of Salt" Effect)                        |
| Note: 'Severe' is patient's perception of grade of discomfort. "Pillar of salt Effect" = rooted to the spot and unable to walk due to severe pain                                                                           |         |                                          |                                                             |                                                                                                             |                                                                                                                         |
| Muscle pain (myalgia)                                                                                                                                                                                                       | None    | Mild                                     | Moderate or 'Severe' but without change in gait or function | 'Severe' and with a definite limp or change in function due to muscle pain                                  | 'Severe' and with marked interference with motion or function (commonly "Pillar of Salt" Effect)                        |
| Note: 'Severe' is patient's perception of grade of discomfort. "Pillar of salt Effect" = rooted to the spot and unable to walk due to severe pain                                                                           |         |                                          |                                                             |                                                                                                             |                                                                                                                         |
| Gland pain                                                                                                                                                                                                                  | None    | Mild                                     | Moderate or 'Severe' but without change in gait or function | 'Severe' and with a definite limp or change in function due to gland pain ("Hydrocele Gait" may be present) | 'Severe' and with marked interference with motion or function (commonly "Pillar of Salt" Effect; "Knee Elbow Position") |
| Note: 'Severe' is patient's perception of grade of discomfort. "Pillar of salt Effect" = rooted to the spot and unable to walk due to severe pain<br>"Hydrocele Gait" = Walking on a broad base with trunk slightly flexed. |         |                                          |                                                             |                                                                                                             |                                                                                                                         |
| Gland tenderness                                                                                                                                                                                                            | None    | Very firm pressure needed to elicit pain | Moderate pressure elicits pain                              | Very light touch elicits severe pain                                                                        | Patient refuses palpation on account of severe pain                                                                     |
| Note: Assessment carried out by Medical Officer                                                                                                                                                                             |         |                                          |                                                             |                                                                                                             |                                                                                                                         |
| Rash                                                                                                                                                                                                                        | None    | < ½ body surface                         | ½-< ¾ body surface                                          | ≥¾ body surface                                                                                             | -                                                                                                                       |
| Note: Assessment carried out by Medical Officer                                                                                                                                                                             |         |                                          |                                                             |                                                                                                             |                                                                                                                         |
| <b>MAZZOTTI REACTION CRITERIA - SYSTEMIC REACTIONS (2)</b>                                                                                                                                                                  |         |                                          |                                                             |                                                                                                             |                                                                                                                         |
| Temperature increase                                                                                                                                                                                                        | <38°C   | 38.0 - 39.0°C                            | 39.1 - 40.0°C                                               | > 40.0°C for < 24hrs                                                                                        | > 40.0°C > 24hrs                                                                                                        |
| Increase in Pulse Rate in beats per minute                                                                                                                                                                                  | 0 -20   | >20-<36                                  | ≥36-<52                                                     | ≥52-<68                                                                                                     | ≥68                                                                                                                     |
| Note: Readings taken lying as well as after standing for 2 minutes                                                                                                                                                          |         |                                          |                                                             |                                                                                                             |                                                                                                                         |
| Fall in Mean Arterial Pressure                                                                                                                                                                                              | 0-20    | >20-<25                                  | ≥25-<30                                                     | ≥30-<35                                                                                                     | ≥35 or CNS*                                                                                                             |
| Note: Readings are taken lying as well as after standing for 2 minutes. * CNS means Could Not Stand long enough for pressure to be taken due to severe postural hypotension                                                 |         |                                          |                                                             |                                                                                                             |                                                                                                                         |
| Increase in Respiratory Rate per minute                                                                                                                                                                                     | 0-<6    | ≥6-<12                                   | ≥12-<18                                                     | ≥18-<24                                                                                                     | ≥24                                                                                                                     |
| Note: Contributes little to overall score                                                                                                                                                                                   |         |                                          |                                                             |                                                                                                             |                                                                                                                         |
| <b>MAZZOTTI REACTION CRITERIA - OTHER REACTIONS</b>                                                                                                                                                                         |         |                                          |                                                             |                                                                                                             |                                                                                                                         |
| Lymphatics                                                                                                                                                                                                                  | Normal  | Mild lymphedema                          | Moderate lymphedema requiring compression; lymphocyst       | Severe lymphedema limiting function; lymphocyst requiring surgery                                           | Severe lymphedema limiting function with ulceration                                                                     |
| Note: An acute brawny edema of one or more limbs is a manifestation of the Mazzotti reaction                                                                                                                                |         |                                          |                                                             |                                                                                                             |                                                                                                                         |
| Facial swelling                                                                                                                                                                                                             | None    | Mild swelling                            | Moderate swelling                                           | Severe with eyes completely shut                                                                            | -                                                                                                                       |
| Note: A fairly common manifestation of the Mazzotti reaction                                                                                                                                                                |         |                                          |                                                             |                                                                                                             |                                                                                                                         |

| <b>Sign/Symptom</b>                                                                      | <b>Grade 0</b> | <b>Grade 1</b>                                                                                     | <b>Grade 2</b>                                                                                                                              | <b>Grade 3</b>                                                                                                                                 | <b>Grade 4</b>                                                                                             |
|------------------------------------------------------------------------------------------|----------------|----------------------------------------------------------------------------------------------------|---------------------------------------------------------------------------------------------------------------------------------------------|------------------------------------------------------------------------------------------------------------------------------------------------|------------------------------------------------------------------------------------------------------------|
| Neuropathy-sensory                                                                       | Normal         | Loss of deep tendon reflexes or paresthesia (including tingling) but not interfering with function | Objective sensory loss or paresthesia (including tingling), interfering with function, but not interfering with activities of daily living  | Sensory loss or paresthesia interfering with activities of daily living                                                                        | Permanent sensory loss that interferes with function                                                       |
| Note: Peripheral Sensory Phenomena (PSP) can be a manifestation of the Mazzotti reaction |                |                                                                                                    |                                                                                                                                             |                                                                                                                                                |                                                                                                            |
| Rigors, chills                                                                           | None           | Mild, requiring symptomatic treatment (e.g., blanket) or non-narcotic medication                   | Severe and/or prolonged, requiring narcotic medication                                                                                      | not responsive to narcotic medication                                                                                                          | -                                                                                                          |
| Fatigue (lethargy, malaise, asthenia)                                                    | None           | Increased fatigue over baseline, but not altering normal activities                                | Moderate (e.g., decrease in performance status by 1 ECOG level or 20% Karnofsky or Lansky) or causing difficulty performing some activities | Severe (e.g., decrease in performance status by $\geq 2$ ECOG levels or 40% Karnofsky or Lansky) or loss of ability to perform some activities | Bedridden or disabling                                                                                     |
| <b>OTHER SYSTEMIC TOXICITY</b>                                                           |                |                                                                                                    |                                                                                                                                             |                                                                                                                                                |                                                                                                            |
| Anorexia                                                                                 | None           | Loss of appetite                                                                                   | oral intake significantly decreased                                                                                                         | Requiring IV fluids                                                                                                                            | Requiring feeding tube or parenteral nutrition                                                             |
| Nausea                                                                                   | None           | Able to eat                                                                                        | oral intake significantly decreased                                                                                                         | no significant intake, requiring IV fluids                                                                                                     | -                                                                                                          |
| 'Bitter' mouth                                                                           | None           | Able to eat                                                                                        | oral intake significantly decreased                                                                                                         | no significant intake, requiring IV fluids                                                                                                     | -                                                                                                          |
| Vomiting                                                                                 | None           | 1 episode in 24 hours over pretreatment                                                            | 2-5 episodes in 24 hours over pretreatment                                                                                                  | $\geq 6$ episodes in 24 hours over pretreatment; or need for IV fluids                                                                         | Requiring parenteral nutrition; or physiologic consequences requiring intensive care; hemodynamic collapse |
| Diarrhea                                                                                 | None           | Increase of $< 4$ stools/day over pre-treatment                                                    | Increase of 4-6 stools/day, or nocturnal stools                                                                                             | Increase of $\geq 7$ stools/day or incontinence; or need for parenteral support for dehydration                                                | Physiologic consequence requiring intensive care; or hemodynamic collapse                                  |
| Abdominal pain or cramping                                                               | None           | Mild pain not interfering with function                                                            | Moderate pain: pain or analgesics interfering with function, but not interfering with activities of daily living                            | Severe pain: pain or analgesics severely interfering with activities of daily living                                                           | Disabling                                                                                                  |
| Cough                                                                                    | Absent         | Mild, relieved by non-prescription medication                                                      | Requiring narcotic antitussive                                                                                                              | Severe cough or coughing spasms, poorly controlled or unresponsive to treatment                                                                | -                                                                                                          |
| Chest pain (non-cardiac and non-pleuritic)                                               | None           | Mild pain not interfering with function                                                            | Moderate pain: pain or analgesics interfering with function, but not interfering with activities of daily living                            | Severe pain: pain or analgesics severely interfering with activities of daily living                                                           | Disabling                                                                                                  |
| Dyspnea (shortness of breath)                                                            | Normal         | -                                                                                                  | Dyspnea on exertion                                                                                                                         | Dyspnea at normal level of activity                                                                                                            | Dyspnea at rest or requiring ventilator support                                                            |
| Palpitations                                                                             | None           | Present                                                                                            | -                                                                                                                                           | -                                                                                                                                              | -                                                                                                          |
| Note: Grade palpitations <u>only</u> in the absence of a documented arrhythmia.          |                |                                                                                                    |                                                                                                                                             |                                                                                                                                                |                                                                                                            |
| Waistpain/Backache                                                                       | None           | Mild pain not interfering with function                                                            | Moderate pain: pain or analgesics interfering with function, but not interfering with activities of daily living                            | Severe pain: pain or analgesics severely interfering with activities of daily living                                                           | Disabling                                                                                                  |

| Sign/Symptom                                                                                                                                                             | Grade 0 | Grade 1                                                                        | Grade 2                                                                                                          | Grade 3                                                                              | Grade 4                        |
|--------------------------------------------------------------------------------------------------------------------------------------------------------------------------|---------|--------------------------------------------------------------------------------|------------------------------------------------------------------------------------------------------------------|--------------------------------------------------------------------------------------|--------------------------------|
| Neckpain                                                                                                                                                                 | None    | Mild pain not interfering with function                                        | Moderate pain: pain or analgesics interfering with function, but not interfering with activities of daily living | Severe pain: pain or analgesics severely interfering with activities of daily living | Disabling                      |
| Bodily pain/aches                                                                                                                                                        | None    | Mild pain not interfering with function                                        | Moderate pain: pain or analgesics interfering with function, but not interfering with activities of daily living | Severe pain: pain or analgesics severely interfering with activities of daily living | Disabling                      |
| Dizziness/lightheadedness                                                                                                                                                | None    | Not interfering with function                                                  | Interfering with function, but not interfering with activities of daily living                                   | Interfering with activities of daily living                                          | Bedridden or disabling         |
| Note: Grade only if unassociated with hypotension                                                                                                                        |         |                                                                                |                                                                                                                  |                                                                                      |                                |
| Constipation                                                                                                                                                             | None    | Requiring stool softener or dietary modification or increased mobility         | Requiring laxatives                                                                                              | Obstipation requiring manual evacuation or enema                                     | Obstruction or toxic megacolon |
| Dyspepsia/heartburn                                                                                                                                                      | None    | Mild                                                                           | Moderate                                                                                                         | Severe                                                                               | -                              |
| Insomnia                                                                                                                                                                 | Normal  | Occasional difficulty sleeping not interfering with function                   | Difficulty sleeping interfering with function, but not interfering with activities of daily living               | Frequent difficulty sleeping, interfering with activities of daily living            | -                              |
| Note: This toxicity is graded when insomnia is related to treatment. (Sleepless for no reason). If pain or other symptoms interfere with sleep do NOT grade as insomnia. |         |                                                                                |                                                                                                                  |                                                                                      |                                |
| Bone pain                                                                                                                                                                | None    | Mild pain not interfering with function                                        | Moderate pain: pain or analgesics interfering with function, but not interfering with activities of daily living | Severe pain: pain or analgesics severely interfering with activities of daily living | Disabling                      |
| Catarrh                                                                                                                                                                  | Absent  | Present                                                                        | -                                                                                                                | -                                                                                    | -                              |
| Earache (otalgia)                                                                                                                                                        | None    | Mild pain not interfering with function                                        | Moderate pain: pain or analgesics interfering with function, but not interfering with activities of daily living | Severe pain: pain or analgesics severely interfering with activities of daily living | Disabling                      |
| Note: It is essential to determine that otalgia is not present pretreatment                                                                                              |         |                                                                                |                                                                                                                  |                                                                                      |                                |
| Toothache                                                                                                                                                                | None    | Mild pain not interfering with function                                        | Moderate pain: pain or analgesics interfering with function, but not interfering with activities of daily living | Severe pain: pain or analgesics severely interfering with activities of daily living | Disabling                      |
| Note: It is essential to determine that toothache is not present pretreatment                                                                                            |         |                                                                                |                                                                                                                  |                                                                                      |                                |
| Weight gain                                                                                                                                                              | < 5%    | 5 - <10%                                                                       | 10 - <20%                                                                                                        | ≥ 20%                                                                                | -                              |
| Weight loss                                                                                                                                                              | < 5%    | 5 - <10%                                                                       | 10 - <20%                                                                                                        | ≥20%                                                                                 | -                              |
| Erectile impotence                                                                                                                                                       | Normal  | Mild (erections impaired but satisfactory)                                     | Moderate (erections impaired, unsatisfactory for intercourse)                                                    | no erections                                                                         | -                              |
| Libido                                                                                                                                                                   | Normal  | Decrease in interest                                                           | severe loss of interest                                                                                          | -                                                                                    | -                              |
| Dysmenorrhea                                                                                                                                                             | None    | Mild pain not interfering with function                                        | Moderate pain: pain or analgesics interfering with function, but not interfering with activities of daily living | Severe pain: pain or analgesics severely interfering with activities of daily living | Disabling                      |
| Irregular menses (change from baseline)                                                                                                                                  | Normal  | Occasionally irregular or lengthened interval, but continuing menstrual cycles | very irregular, but continuing menstrual cycles                                                                  | Persistent amenorrhea                                                                | -                              |
| <b>MAZZOTTI REACTION CRITERIA - OCULAR REACTIONS</b>                                                                                                                     |         |                                                                                |                                                                                                                  |                                                                                      |                                |



| <b>Sign/Symptom</b>                                                                                                                                                                                                    | <b>Grade 0</b>        | <b>Grade 1</b>                      | <b>Grade 2</b>                                                                                 | <b>Grade 3</b>                                              | <b>Grade 4</b>                |
|------------------------------------------------------------------------------------------------------------------------------------------------------------------------------------------------------------------------|-----------------------|-------------------------------------|------------------------------------------------------------------------------------------------|-------------------------------------------------------------|-------------------------------|
| Ocular discomfort                                                                                                                                                                                                      | Normal                | mild: not interfering with function | Moderate: interfering with function, but not interfering with activities of daily living       | Interfering with activities of daily living                 | -                             |
| Ocular itching                                                                                                                                                                                                         | Normal                | mild: not interfering with function | Moderate: interfering with function, but not interfering with activities of daily living       | Interfering with activities of daily living                 | -                             |
| Tearing (watery eyes)                                                                                                                                                                                                  | None                  | mild: not interfering with function | Moderate: interfering with function, but not interfering with activities of daily living       | Interfering with activities of daily living                 | -                             |
| Vision- photophobia                                                                                                                                                                                                    | Normal                | -                                   | Symptomatic and interfering with function, but not interfering with activities of daily living | Symptomatic and interfering with activities of daily living | -                             |
| Visual acuity                                                                                                                                                                                                          | Un-changed or 6/4-6/6 | Loss of 1 line                      | Loss of 2 lines                                                                                | Loss of 3 lines                                             | Loss of >3 lines              |
| Anterior Segment inflammation                                                                                                                                                                                          |                       |                                     |                                                                                                |                                                             |                               |
| Conjunctivitis                                                                                                                                                                                                         | None                  | -                                   | Hyperaemia                                                                                     | -                                                           | Chemosis                      |
| Limbitis-vascular changes                                                                                                                                                                                              | None                  | -                                   | Dilated capillaries                                                                            | -                                                           | Limbal oedema                 |
| Limbitis-globular infiltrates                                                                                                                                                                                          | None                  | 1-5                                 | 6-10                                                                                           | 11-20                                                       | >20                           |
| Corneal punctate opacities                                                                                                                                                                                             | None                  | 1-5                                 | 6-10                                                                                           | 11-20                                                       | >20                           |
| Anterior uveitis                                                                                                                                                                                                       |                       |                                     |                                                                                                |                                                             |                               |
| No of cells/field *                                                                                                                                                                                                    | None                  | 1-10                                | 11-20                                                                                          | 21-40                                                       | >40                           |
| Flare**                                                                                                                                                                                                                | None                  | Seen with no filter                 | Seen with filter 1                                                                             | Seen with filter 2                                          | Plasmoid aqueous              |
| Note: * Light beam at 45 degrees; slit 2mm high by 0.2mm wide. ** Light beam at 45 degrees; slit 2mm high by 0.1mm wide. Filters 1 and 2 are neutral density filters in-built into the optical column of the slit lamp |                       |                                     |                                                                                                |                                                             |                               |
| Posterior segment                                                                                                                                                                                                      |                       |                                     |                                                                                                |                                                             |                               |
| Optic neuritis (colour film)                                                                                                                                                                                           |                       |                                     |                                                                                                |                                                             |                               |
| Hyperaemia                                                                                                                                                                                                             | None                  | Sectorial                           | Overall                                                                                        | -                                                           | -                             |
| Swelling                                                                                                                                                                                                               | None                  | -                                   | -                                                                                              | Sectorial                                                   | Overall                       |
| Angiographic leakage                                                                                                                                                                                                   |                       |                                     |                                                                                                |                                                             |                               |
| Within disc margin                                                                                                                                                                                                     | None                  | Sectorial                           | Overall                                                                                        | -                                                           | -                             |
| Beyond disc margin                                                                                                                                                                                                     | None                  | -                                   | -                                                                                              | Sectorial                                                   | Overall                       |
| Optic atrophy                                                                                                                                                                                                          |                       |                                     |                                                                                                |                                                             |                               |
| Colour film                                                                                                                                                                                                            | None                  | Linear nerve fibre loss             | Sectorial atrophy                                                                              | Overall atrophy                                             | Atrophy with pigment          |
| Red free                                                                                                                                                                                                               | None                  | Linear nerve fibre loss             | Sectorial fibre loss                                                                           | Total loss                                                  | Total loss with pigment       |
| Pigment Epithelial Atrophy                                                                                                                                                                                             |                       |                                     |                                                                                                |                                                             |                               |
| Distribution                                                                                                                                                                                                           | None                  | Temporal to macula                  | More than temporal                                                                             | Continuous round macula                                     | Whole of macula               |
| Intensity                                                                                                                                                                                                              | None                  | RPE mottling only                   | RPE mottling with <50% atrophy                                                                 | RPE mottling with ≥50% atrophy                              | RPE mottling with hypertrophy |
| Other onchocercal lesions                                                                                                                                                                                              |                       |                                     |                                                                                                |                                                             |                               |
| Cotton wool spots                                                                                                                                                                                                      | Absent                | Present                             | -                                                                                              | -                                                           | -                             |
| Vasculitis                                                                                                                                                                                                             | Absent                | Present                             | -                                                                                              | -                                                           | -                             |
| Haemorrhage                                                                                                                                                                                                            | Absent                | Present                             | -                                                                                              | -                                                           | -                             |
| Note: Once an event has occurred the score is retained at subsequent visits whether the lesion persists or not.                                                                                                        |                       |                                     |                                                                                                |                                                             |                               |
| <b>OTHER OCULAR TOXICITY</b>                                                                                                                                                                                           |                       |                                     |                                                                                                |                                                             |                               |
| Ocular discharge                                                                                                                                                                                                       | None                  | Present                             | -                                                                                              | -                                                           | -                             |
| Vision- blurred vision                                                                                                                                                                                                 | Normal                | -                                   | Symptomatic and interfering with function, but not interfering with activities of daily living | Symptomatic and interfering with activities of daily living | -                             |

| Sign/Symptom                                                                    | Grade 0 | Grade 1                                                                                        | Grade 2                                                                                        | Grade 3                                                                                                                   | Grade 4                                                                              |
|---------------------------------------------------------------------------------|---------|------------------------------------------------------------------------------------------------|------------------------------------------------------------------------------------------------|---------------------------------------------------------------------------------------------------------------------------|--------------------------------------------------------------------------------------|
| Vision- flashing lights/floaters                                                | Normal  | Mild, not interfering with function                                                            | Symptomatic and interfering with function, but not interfering with activities of daily living | Symptomatic and interfering with activities of daily living                                                               | -                                                                                    |
| Vision- night blindness (nyctalopia)                                            | Normal  | Present but asymptomatic                                                                       | Symptomatic and interfering with function, but not interfering with activities of daily living | Symptomatic and interfering with activities of daily living                                                               | -                                                                                    |
| <b>ALLERGIC REACTION commonly to FLUORESCEIN</b>                                |         |                                                                                                |                                                                                                |                                                                                                                           |                                                                                      |
| Allergic reaction/ hypersensitivity (including drug fever)                      | None    | Transient rash, drug fever < 38°C (<100.4°F)                                                   | urticaria, drug fever ≥ 38°C (≥100.4°F), and/or asymptomatic bronchospasm                      | Symptomatic bronchospasm, requiring parenteral medication(s), with or without urticaria; allergy-related edema/angioedema | Anaphylaxis                                                                          |
| Sneezing                                                                        | Absent  | Present                                                                                        | -                                                                                              | -                                                                                                                         | -                                                                                    |
| Dry cough, no bronchospasm                                                      | Absent  | Present                                                                                        | -                                                                                              | -                                                                                                                         | -                                                                                    |
| Urticaria (hives, welts, wheals)                                                | None    | Requiring no medication                                                                        | requiring PO or topical treatment or IV medication or steroids for <24 hours                   | requiring IV medication or steroids for ≥24 hours                                                                         | -                                                                                    |
| Note: Also anorexia, nausea, vomiting, rigors, chills                           |         |                                                                                                |                                                                                                |                                                                                                                           |                                                                                      |
| <b>ELECTROCARDIOGRAPHY</b>                                                      |         |                                                                                                |                                                                                                |                                                                                                                           |                                                                                      |
| Conduction abnormality/ Atrioventricular heart block                            | None    | Asymptomatic, not requiring treatment (e.g., Mobitz type I second-degree AV block, Wenckebach) | Symptomatic, but not requiring treatment                                                       | symptomatic and requiring treatment (e.g., Mobitz type II second-degree AV block, third-degree AV block)                  | Life-threatening (e.g., arrhythmia associated with CHF, hypotension, syncope, shock) |
| Nodal/junctional arrhythmia/dysrhythmia                                         | None    | Asymptomatic, not requiring treatment                                                          | symptomatic, but not requiring treatment                                                       | symptomatic and requiring treatment                                                                                       | Life-threatening (e.g., arrhythmia associated with CHF, hypotension, syncope, shock) |
| Palpitations                                                                    | None    | Present                                                                                        | -                                                                                              | -                                                                                                                         | -                                                                                    |
| Note: Grade palpitations <u>only</u> in the absence of a documented arrhythmia. |         |                                                                                                |                                                                                                |                                                                                                                           |                                                                                      |
| Prolonged QTc interval (QTc > 0.48 seconds)                                     | None    | Asymptomatic, not requiring treatment                                                          | symptomatic, but not requiring treatment                                                       | symptomatic and requiring treatment                                                                                       | Life-threatening (e.g., arrhythmia associated with CHF, hypotension, syncope, shock) |
| Sinus bradycardia                                                               | None    | Asymptomatic, not requiring treatment                                                          | symptomatic, but not requiring treatment                                                       | symptomatic and requiring treatment                                                                                       | Life-threatening (e.g., arrhythmia associated with CHF, hypotension, syncope, shock) |
| Sinus tachycardia                                                               | None    | Asymptomatic, not requiring treatment                                                          | symptomatic, but not requiring treatment                                                       | symptomatic and requiring treatment of underlying cause                                                                   | -                                                                                    |
| Supraventricular arrhythmias (SVT/atrial fibrillation/ flutter)                 | None    | Asymptomatic, not requiring treatment                                                          | symptomatic, but not requiring treatment                                                       | symptomatic and requiring treatment                                                                                       | Life-threatening (e.g., arrhythmia associated with CHF, hypotension, syncope, shock) |
| Vasovagal episode                                                               | None    | -                                                                                              | present without loss of consciousness                                                          | present with loss of consciousness                                                                                        | -                                                                                    |
| Ventricular arrhythmia (PVCs/bigeminy/trigeminy/ventricular tachycardia)        | None    | Asymptomatic, not requiring treatment                                                          | symptomatic, but not requiring treatment                                                       | symptomatic and requiring treatment                                                                                       | Life-threatening (e.g., arrhythmia associated with CHF, hypotension, syncope, shock) |
| Peaking of T wave                                                               | None    | Mild-moderate                                                                                  | Marked                                                                                         | -                                                                                                                         | -                                                                                    |
| Cardiac- ischemia/infarction                                                    | None    | Non-specific T-wave flattening or changes                                                      | Asymptomatic, ST- and T- wave changes suggesting ischemia                                      | angina without evidence of infarction                                                                                     | acute myocardial infarction                                                          |
| <b>HAEMATOLOGICAL</b>                                                           |         |                                                                                                |                                                                                                |                                                                                                                           |                                                                                      |
| G6PD                                                                            | Normal  | Partial defect                                                                                 | Total defect                                                                                   | -                                                                                                                         | -                                                                                    |
| Hemoglobin (Hgb)                                                                | WNL     | 10-<25% reduction                                                                              | 25-<50% reduction                                                                              | 50-<75% reduction                                                                                                         | ≥75%                                                                                 |
| Leukocytes (total WBC)                                                          | WNL     | < 2.8 – 2.3 x 10 <sup>9</sup> /L                                                               | < 2.3 - 1.8 x 10 <sup>9</sup> /L                                                               | < 1.8 - 1.3 x 10 <sup>9</sup> /L                                                                                          | < 1.3 x 10 <sup>9</sup> /L                                                           |
|                                                                                 | WNL     | > 11.3-19.0 x 10 <sup>9</sup> /L                                                               | >19.0-38.0 x 10 <sup>9</sup> /L                                                                | >38.0-57.0 x 10 <sup>9</sup> /L                                                                                           | > 57.0 x 10 <sup>9</sup> /L                                                          |

| Sign/Symptom                                                                                                                                   | Grade 0                                                                                                                        | Grade 1                                                                                            | Grade 2                                                                           | Grade 3                                                            | Grade 4                                                                                                        |
|------------------------------------------------------------------------------------------------------------------------------------------------|--------------------------------------------------------------------------------------------------------------------------------|----------------------------------------------------------------------------------------------------|-----------------------------------------------------------------------------------|--------------------------------------------------------------------|----------------------------------------------------------------------------------------------------------------|
| Note: Contributory factors include <b>Mazzotti</b> reaction (leucocytosis), coincidental infection (exclude) drug effect                       |                                                                                                                                |                                                                                                    |                                                                                   |                                                                    |                                                                                                                |
| Neutrophils/granulocytes (ANC/AGC)                                                                                                             | WNL                                                                                                                            | <0.476-0.376 10 <sup>9</sup> /L                                                                    | <0.376-0.276 10 <sup>9</sup> /L                                                   | <0.276-0.176 10 <sup>9</sup> /L                                    | <0.176 10 <sup>9</sup> /L                                                                                      |
|                                                                                                                                                | WNL                                                                                                                            | >6.102-12.204 10 <sup>9</sup> /L                                                                   | >12.204-24.409 10 <sup>9</sup> /L                                                 | >24.409-36.614 10 <sup>9</sup> /L                                  | >36.614 10 <sup>9</sup> /L                                                                                     |
| Note: Contributory factors include <b>Mazzotti</b> reaction (neutrophilia), coincidental infection (exclude) drug effect                       |                                                                                                                                |                                                                                                    |                                                                                   |                                                                    |                                                                                                                |
| Lymphocytes                                                                                                                                    | WNL                                                                                                                            | <0.980-0.880 10 <sup>9</sup> /L                                                                    | <0.880 -0.780 10 <sup>9</sup> /L                                                  | <0.780-0.680 10 <sup>9</sup> /L                                    | <0.680 10 <sup>9</sup> /L -                                                                                    |
|                                                                                                                                                | WNL                                                                                                                            | >7.571-15.142 10 <sup>9</sup> /L                                                                   | >15.132-30.285 10 <sup>9</sup> /L                                                 | >30.285-45.429 10 <sup>9</sup> /L                                  | >45.429 10 <sup>9</sup> /L                                                                                     |
| Note: Contributory factors include <b>Mazzotti</b> reaction (initial lymphopenia, lymphocytosis), coincidental infection (exclude) drug effect |                                                                                                                                |                                                                                                    |                                                                                   |                                                                    |                                                                                                                |
| Eosinophils (Any normal range applies)                                                                                                         | WNL                                                                                                                            | <LLN - 0.83 x LLN                                                                                  | <0.83 - 0.65 x LLN                                                                | <0.65 - 0.47 x LLN                                                 | <0.47 x LLN                                                                                                    |
|                                                                                                                                                | WNL                                                                                                                            | >ULN - 2 x ULN                                                                                     | >2 - 4 x ULN                                                                      | >4 - 6 x ULN                                                       | >6 x ULN                                                                                                       |
| Note: Contributory factors include <b>Mazzotti</b> reaction (initial eosinopenia, eosinophilia), coincidental infection (exclude) drug effect  |                                                                                                                                |                                                                                                    |                                                                                   |                                                                    |                                                                                                                |
| Eosinophils (normal range = 1-11 %)                                                                                                            | WNL                                                                                                                            | <0.028-0.023 10 <sup>9</sup> /L                                                                    | <0.023-0.018 10 <sup>9</sup> /L                                                   | <0.018-0.013 10 <sup>9</sup> /L                                    | <0.013 10 <sup>9</sup> /L                                                                                      |
|                                                                                                                                                | WNL                                                                                                                            | >1.243-2.486 10 <sup>9</sup> /L                                                                    | >2.486-4.972 10 <sup>9</sup> /L                                                   | >4.972-7.458 10 <sup>9</sup> /L                                    | >7.458 10 <sup>9</sup> /L                                                                                      |
| Note: Contributory factors include <b>Mazzotti</b> reaction (initial eosinopenia, eosinophilia), coincidental infection (exclude) drug effect  |                                                                                                                                |                                                                                                    |                                                                                   |                                                                    |                                                                                                                |
| Eosinophils (normal range = 1-6 %)                                                                                                             | WNL                                                                                                                            | <0.028-0.023 10 <sup>9</sup> /L                                                                    | <0.023-0.018 10 <sup>9</sup> /L                                                   | <0.018-0.013 10 <sup>9</sup> /L                                    | <0.013 10 <sup>9</sup> /L                                                                                      |
|                                                                                                                                                | WNL                                                                                                                            | >0.678-1.356 10 <sup>9</sup> /L                                                                    | >1.356-2.712 10 <sup>9</sup> /L                                                   | >2.712-4.068 10 <sup>9</sup> /L                                    | >4.068 10 <sup>9</sup> /L                                                                                      |
| Note: Contributory factors include <b>Mazzotti</b> reaction (initial eosinopenia, eosinophilia), coincidental infection (exclude) drug effect  |                                                                                                                                |                                                                                                    |                                                                                   |                                                                    |                                                                                                                |
| Platelets                                                                                                                                      | WNL                                                                                                                            | < LLN - <75.0 x 10 <sup>9</sup> /L                                                                 | ≥50.0 - < 75.0 x 10 <sup>9</sup> /L                                               | ≥10.0 - < 50.0 x 10 <sup>9</sup> /L                                | < 10.0 x 10 <sup>9</sup> /L                                                                                    |
| Hemolysis (e.g., immune hemolytic anemia, drug-related hemolysis, other)                                                                       | None                                                                                                                           | Only laboratory evidence of hemolysis [e.g., direct antiglobulin test (DAT, Coombs') schistocytes] | Evidence of red cell destruction and ≥ 2gm decrease in hemoglobin, no transfusion | Requiring transfusion and/or medical intervention (e.g., steroids) | Catastrophic consequences of hemolysis (e.g., renal failure, hypotension, bronchospasm, emergency splenectomy) |
| <b>BIOCHEMICAL</b>                                                                                                                             |                                                                                                                                |                                                                                                    |                                                                                   |                                                                    |                                                                                                                |
| Hyponatremia                                                                                                                                   | WNL                                                                                                                            | <LLN - 130 mmol/L                                                                                  | -                                                                                 | 120 - <130 mmol/L                                                  | <120 mmol/L                                                                                                    |
| Hypernatremia                                                                                                                                  | WNL                                                                                                                            | > ULN - 150 mmol/L                                                                                 | >150 - 155 mmol/L                                                                 | >155 - 160 mmol/L                                                  | >160 mmol/L                                                                                                    |
| Hypokalemia                                                                                                                                    | WNL                                                                                                                            | <LLN - 3.0 mmol/L                                                                                  | -                                                                                 | 2.5 - <3.0 mmol/L                                                  | <2.5 mmol/L                                                                                                    |
| Hyperkalemia                                                                                                                                   | WNL                                                                                                                            | > ULN - 5.5 mmol/L                                                                                 | > 5.5 - 6.0 mmol/L                                                                | > 6.0 - 7.0 mmol/L                                                 | > 7.0 mmol/L                                                                                                   |
| Bicarbonate                                                                                                                                    | WNL                                                                                                                            | < LLN - 16 mEq/dl                                                                                  | 11 - 15 mEq/dl                                                                    | 8 - 10 mEq/dl                                                      | <8 mEq/dl                                                                                                      |
| Hyperuricemia                                                                                                                                  | WNL                                                                                                                            | > ULN - ≤ 590 micromol/L without physiologic consequences                                          | -                                                                                 | >ULN - ≤ 590 micromol/L with physiologic consequences              | > 590 micromol/L                                                                                               |
| Note: Also consider Renal failure, Creatinine, Potassium.                                                                                      |                                                                                                                                |                                                                                                    |                                                                                   |                                                                    |                                                                                                                |
| Creatinine                                                                                                                                     | WNL                                                                                                                            | > ULN - 1.5 x ULN                                                                                  | > 1.5 - 3.0 x ULN                                                                 | > 3.0 - 6.0 x ULN                                                  | > 6.0 x ULN                                                                                                    |
| SGPT (ALT) (serum glutamic pyruvic transaminase)                                                                                               | WNL                                                                                                                            | > ULN - 2.5 x ULN                                                                                  | > 2.5 - 5.0 x ULN                                                                 | > 5.0 - 20.0 x ULN                                                 | > 20.0 x ULN                                                                                                   |
|                                                                                                                                                | Note: Elevations occur as part of the <b>Mazzotti</b> reaction but rarely reach 5 x ULN and usually last for less than 30 days |                                                                                                    |                                                                                   |                                                                    |                                                                                                                |
| SGOT (AST) (serum glutamic oxaloacetic transaminase)                                                                                           | WNL                                                                                                                            | > ULN - 2.5 x ULN                                                                                  | > 2.5 - 5.0 x ULN                                                                 | > 5.0 - 20.0 x ULN                                                 | > 20.0 x ULN                                                                                                   |
|                                                                                                                                                | Note: Elevations occur as part of the <b>Mazzotti</b> reaction but rarely reach 5 x ULN and usually last for less than 30 days |                                                                                                    |                                                                                   |                                                                    |                                                                                                                |
| GGT (γ - Glutamyl transpeptidase)                                                                                                              | WNL                                                                                                                            | > ULN - 2.5 x ULN                                                                                  | > 2.5 - 5.0 x ULN                                                                 | > 5.0 - 20.0 x ULN                                                 | > 20.0 x ULN                                                                                                   |
|                                                                                                                                                | Note: Elevations occur as part of the <b>Mazzotti</b> reaction but rarely reach 5 x ULN and usually last for less than 30 days |                                                                                                    |                                                                                   |                                                                    |                                                                                                                |
| LDH (Lactate dehydrogenase)                                                                                                                    | WNL                                                                                                                            | > ULN - 2.5 x ULN                                                                                  | > 2.5 - 5.0 x ULN                                                                 | > 5.0 - 20.0 x ULN                                                 | > 20.0 x ULN                                                                                                   |
|                                                                                                                                                | Note: Elevations occur as part of the <b>Mazzotti</b> reaction but rarely reach 5 x ULN and usually last for less than 30 days |                                                                                                    |                                                                                   |                                                                    |                                                                                                                |
| Alkaline phosphatase                                                                                                                           | WNL                                                                                                                            | > ULN - 2.5 x ULN                                                                                  | > 2.5 - 5.0 x ULN                                                                 | > 5.0 - 20.0 x ULN                                                 | > 20.0 x ULN                                                                                                   |

| <b>Sign/Symptom</b>                        | <b>Grade 0</b>                              | <b>Grade 1</b>                       | <b>Grade 2</b>              | <b>Grade 3</b>                                                                                    | <b>Grade 4</b>                                      |
|--------------------------------------------|---------------------------------------------|--------------------------------------|-----------------------------|---------------------------------------------------------------------------------------------------|-----------------------------------------------------|
| Total Bilirubin                            | WNL                                         | > ULN - 1.5 x ULN                    | > 1.5 - 3.0 x ULN           | > 3.0 - 10.0 x ULN                                                                                | > 10.0 x ULN                                        |
| Hypoalbuminemia                            | WNL                                         | <LLN - 30 g/L                        | ≥20 - <30 g/L               | <20 g/L                                                                                           | -                                                   |
| Hypoglycemia                               | WNL                                         | <LLN - 3.0 mmol/L                    | 2.2 - <3.0 mmol/L           | 1.7 - <2.2 mmol/L                                                                                 | < 1.7 mmol/L                                        |
| Hyperglycemia                              | WNL                                         | > ULN - 8.9 mmol/L                   | > 8.9 - 13.9 mmol/L         | > 13.9 - 27.8 mmol/L                                                                              | > 27.8 mmol/L or ketoacidosis                       |
| Hypercholesterolemia                       | WNL                                         | > ULN - 7.75 mmol/L                  | > 7.75 - 10.34 mmol/L       | >10.34 - 12.92 mmol/L                                                                             | > 12.92 mmol/L                                      |
| Hypertriglyceridemia                       | WNL                                         | > ULN - 2.5 x ULN                    | > 2.5 - 5.0 x ULN           | > 5.0 - 10 x ULN                                                                                  | > 10 x ULN                                          |
| <b>URINE</b>                               |                                             |                                      |                             |                                                                                                   |                                                     |
| Protein                                    | Negative or Trace                           | 1 +                                  | 2 + to 3 +                  | 4 +                                                                                               | Nephrotic syndrome                                  |
| Blood (in the absence of vaginal bleeding) | None (Negative on urinalysis via multistix) | Microscopic only, ≥ 4 to <50 RBC/HPF | Intermittent gross bleeding | Persistent gross bleeding or clots; may require catheterization or instrumentation or transfusion | Open surgery or necrosis or deep bladder ulceration |
| Specific Gravity                           | 1.005-1.030                                 | NA                                   | NA                          | NA                                                                                                | NA                                                  |
| Leukocyte Esterase                         | Negative                                    | Positive AND ≥ 6 WBC/HPF             | NA                          | NA                                                                                                | NA                                                  |
| Nitrite                                    | Negative                                    | Positive AND ≥ 6 WBC/HPF             | NA                          | NA                                                                                                | NA                                                  |
| pH                                         | 5.0 - 9.0                                   | NA                                   | NA                          | NA                                                                                                | NA                                                  |
| Glucose                                    | Negative                                    | Trace to 2+                          | 3- 4+                       | NA                                                                                                | NA                                                  |
| Ketones                                    | Negative                                    | Trace to moderate                    | Large                       | NA                                                                                                | NA                                                  |
| Bilirubin                                  | Negative                                    | Small to moderate                    | Large                       | NA                                                                                                | NA                                                  |
| Urobilinogen (µmol/L)                      | <1                                          | 1.0-2.0                              | 4-8                         | NA                                                                                                | NA                                                  |
| White blood cells                          | <5 /HPF                                     | ≥ 6 WBC/HPF                          | NA                          | NA                                                                                                | NA                                                  |
| Red Blood Cells                            | 0-3/HPF                                     | ≥ 4 to <50 RBC/HPF                   | NA                          | NA                                                                                                | NA                                                  |

**Table S 3: Grading of visual fields abnormalities measured via FDT perimetry**

| Grade              | Mean Deviation (MD) value                                                                                                                                                                                                 |
|--------------------|---------------------------------------------------------------------------------------------------------------------------------------------------------------------------------------------------------------------------|
| 0<br>(normal)      | MD value is positive OR negative AND<br>Mean deviation is $\geq 95\%$ of FDT fields of subjects of that age with normal vision (no percentile indicated after the MD value)                                               |
| 1<br>(mild)        | MD value is negative AND<br>The probability is $<5\%$ that the overall sensitivity of the subject is in the range of $\geq 95\%$ of the people with normal vision of that age (P $<5\%$ indicated after the MD value)     |
| 2<br>(moderate)    | MD value is negative AND<br>The probability is $<2\%$ that the overall sensitivity of the subject is in the range of $\geq 95\%$ of the people with normal vision of that age (P $<2\%$ indicated after the MD value)     |
| 3<br>(severe)      | MD value is negative AND<br>The probability is $<1\%$ that the overall sensitivity of the subject is in the range of $\geq 95\%$ of the people with normal vision of that age (P $<1\%$ indicated after the MD value)     |
| 4<br>(very severe) | MD value is negative AND<br>The probability is $<0.5\%$ that the overall sensitivity of the subject is in the range of $\geq 95\%$ of the people with normal vision of that age (P $<0.5\%$ indicated after the MD value) |

**Table S 4: Grading of colour vision with PV16**

| Grade                           | Criteria                                                                                                                                                                                  |
|---------------------------------|-------------------------------------------------------------------------------------------------------------------------------------------------------------------------------------------|
| Normal (grade 0)                | $<$ four (4) crossings if there is <b>NO</b> definitive axis (i.e. the majority of crossings are not parallel to the protan, deutan or tritan axes on the circular result reporting form) |
| Abnormal<br>(mild, grade 1)     | 4 - 10 crossings<br>OR<br>$<$ 4 crossings with a definitive axes (i.e. all parallel to one of the three axes defined on the result reporting sheet (protan, deutan or tritan))            |
| Abnormal<br>(moderate, grade 2) | Not defined                                                                                                                                                                               |
| Abnormal<br>(severe, grade 3)   | $>$ 10 crossings                                                                                                                                                                          |

**Table S 5: Grading of laboratory events not included in other grading scales provided**

| Parameter         | Grade |                                                    |                                                    |                                                    |                         |
|-------------------|-------|----------------------------------------------------|----------------------------------------------------|----------------------------------------------------|-------------------------|
|                   | 0     | 1                                                  | 2                                                  | 3                                                  | 4                       |
| Platelet increase | WNL   | $>$ ULN<br>$- 850 \times 10^9 /L$                  | $> 850 \times 10^9 /L$<br>$- 1500 \times 10^9 /L$  | $> 1500 \times 10^9 /L$                            | NA                      |
| Monocyte increase | WNL   | $> 1.13 \times 10^9 /L$<br>$- 2.26 \times 10^9 /L$ | $> 2.26 \times 10^9 /L$<br>$- 4.52 \times 10^9 /L$ | $> 4.52 \times 10^9 /L$<br>$- 9.04 \times 10^9 /L$ | $> 9.04 \times 10^9 /L$ |
| Basophil increase | WNL   | $> 0.1 \times 10^9 /L$<br>$- 0.2 \times 10^9 /L$   | $> 0.2 \times 10^9 /L$<br>$- 0.4 \times 10^9 /L$   | $> 0.4 \times 10^9 /L$<br>$- 0.8 \times 10^9 /L$   | $> 0.8 \times 10^9 /L$  |

## 1.4 Mazzotti reactions

### 1.4.1 Overview of Mazzotti reactions

Common systemic clinical manifestations of the Mazzotti reaction include pruritus, rash, lymphadenitis, headache, myalgia, arthralgia, hypotension, fever, and swelling of the face and limbs.<sup>1</sup> Ocular events include epiphora, photophobia, conjunctival injection, limbitis, anterior uveitis, chorioretinitis, and optic neuritis.<sup>2</sup> The clinical laboratory changes involve the peripheral blood leukocytes, AST, ALT and sometimes LDH, and GGT; microfilariae also appear in blood, urine, and other body fluids. The eosinophils exhibit the most prominent changes. There may be an initial eosinopenia followed several days later by a marked increase above pretreatment levels. A complete disappearance of eosinophils from the peripheral blood is the laboratory hallmark of a severe reaction. Lymphocyte counts may fall initially, followed by lymphocytosis, but not to the same extent as with eosinophils. Leukocytosis with neutrophilia is less common. Elevations in liver enzymes occur, but rarely exceed grade 2 and usually normalize by day 30. Levels of bilirubin and AP are usually unchanged. Proteinuria may occur. Although the laboratory changes *per se* have little clinical significance, they give indirect evidence of the death of microfilariae and may even indicate the speed and severity of the reaction to the event.<sup>3</sup> The factors that govern the Mazzotti reaction include the intensity of infection,<sup>4</sup> the dose regimen, and the microfilaricide used. These determine the onset, evolution, reaction severity, extent of the laboratory changes, and whether the reaction is mono- or biphasic. A notable exception occurs in subjects with hyperreactive onchodermatitis (Sowda),<sup>5</sup> where severe, predominantly cutaneous adverse effects occur even with very low skin microfilarial counts.

For a given intensity of infection, the severity of the Mazzotti reaction to ivermectin is independent of dose within the range of 150 to 800  $\mu\text{g}/\text{kg}$  (approximately 9 mg to 48 mg for weights between 45 kg and 64 kg).<sup>6</sup> Dangerous and alarming reactions result from the simultaneous occurrence of severe reactions in multiple systems.<sup>7</sup> This phenomenon is rare with ivermectin. Biphasic reactions, characterized by a marked

recrudescence of cutaneous or lymph node symptoms or the development of an acute febrile polyarthritis,<sup>8</sup> several days after the initial reaction, have also not been observed with ivermectin.

#### 1.4.2 Coding of adverse events characterized as Mazzotti reactions

The Medical Dictionary for Regulatory Agencies (MedDRA), the standard for coding of investigator verbatims of adverse events (AE) into 'preferred terms' and their assignment to system organ classes, results for common types of Mazzotti reactions (e.g. swelling, pruritus, pain) into distribution across different system organ classes and preferred terms. This does not facilitate comparison of the frequency of Mazzotti reactions after different treatments. Therefore, AEs characterized as Mazzotti reactions were coded and grouped into reaction clusters and reaction groups with a dictionary specifically designed for Mazzotti reactions based on the experience at OCRC (Table S 6).

**Table S 6: Dictionary for coding signs and symptoms of onchocerciasis and AEs characterized as Mazzotti reactions into reaction clusters and groups**

| Reaction Cluster                     | Reaction Group                                       | Sign/Symptom                                                                                                         |
|--------------------------------------|------------------------------------------------------|----------------------------------------------------------------------------------------------------------------------|
| <b>Clinical Mazzotti reactions</b>   | Dermal                                               | Pruritus                                                                                                             |
|                                      |                                                      | Rash                                                                                                                 |
|                                      | Glandular                                            | Lymph node pain                                                                                                      |
|                                      |                                                      | Gland pain                                                                                                           |
|                                      |                                                      | Lymph node tenderness                                                                                                |
|                                      | Musculo skeletal                                     | Arthralgia                                                                                                           |
|                                      |                                                      | Myalgia                                                                                                              |
|                                      | Febrile                                              | Headache                                                                                                             |
|                                      |                                                      | Pyrexia                                                                                                              |
|                                      | Cardiovascular                                       | Orthostatic hypotension                                                                                              |
|                                      |                                                      | Severe symptomatic postural hypotension (SSPH)                                                                       |
|                                      |                                                      | Heart rate standing increased (<math>\leq 100/\text{min}</math>)                                                     |
|                                      |                                                      | Postural tachycardia                                                                                                 |
|                                      |                                                      | Supine hypotension                                                                                                   |
|                                      |                                                      | Heart rate increased lying (<math>\leq 100/\text{min}</math>)                                                        |
|                                      |                                                      | Supine tachycardia                                                                                                   |
|                                      | Asthenia                                             | Asthenia                                                                                                             |
|                                      |                                                      | Fatigue                                                                                                              |
|                                      |                                                      | Lethargy                                                                                                             |
|                                      |                                                      | Malaise                                                                                                              |
|                                      | Back pain                                            | Back pain                                                                                                            |
|                                      |                                                      | Waist pain                                                                                                           |
|                                      | Rigors/Chills                                        | Rigors<br>Chills                                                                                                     |
|                                      | Dizziness                                            | Dizziness<br>light headedness                                                                                        |
|                                      |                                                      | Dizziness postural                                                                                                   |
|                                      | Nausea                                               | Nausea postural                                                                                                      |
|                                      | Pain (other than back pain, waist pain, extremities) | Pain (neckpain, bodily pain/aches)                                                                                   |
|                                      | Peripheral sensory phenomena                         | Peripheral sensory phenomena (tingling, stinging, burning sensation, paraesthesia, heaviness, numbness, hot flushes) |
|                                      | Other sensory phenomena                              | Other sensory phenomena                                                                                              |
|                                      | Swelling                                             | Brawny oedema                                                                                                        |
|                                      |                                                      | Face oedema                                                                                                          |
|                                      |                                                      | Joint swelling                                                                                                       |
| Lymph node oedema                    |                                                      |                                                                                                                      |
| Other oedema                         |                                                      |                                                                                                                      |
| Tachypnea                            | Tachypnea (Increased respiratory rate)               |                                                                                                                      |
| Urticaria                            | Urticaria                                            |                                                                                                                      |
| <b>Laboratory Mazzotti Reactions</b> | Haematology                                          | Leukocytopenia (CS or not)                                                                                           |
|                                      |                                                      | Leukocytosis (CS or not)                                                                                             |
|                                      |                                                      | Eosinopenia (CS or not)                                                                                              |
|                                      |                                                      | Eosinophilia (CS or not)                                                                                             |
|                                      |                                                      | Lymphopenia (CS or not)                                                                                              |
|                                      |                                                      | Lymphocytosis (CS or not)                                                                                            |
|                                      |                                                      | Neutrophilia (CS or not)                                                                                             |

| Reaction Cluster                   | Reaction Group      | Sign/Symptom                                                        |
|------------------------------------|---------------------|---------------------------------------------------------------------|
|                                    | Serum Biochemistry  | SGOT_AST > ULN (CS or not)                                          |
|                                    |                     | SGPT_ALT > ULN (CS or not)                                          |
|                                    |                     | $\gamma$ -GT > ULN (CS or not)                                      |
|                                    |                     | AP > ULN(CS or not)                                                 |
|                                    |                     | LDH > ULN (CS or not)                                               |
|                                    | Urine               | Proteinuria (CS or not)                                             |
|                                    |                     | Microscopic haematuria (CS or not)                                  |
| <b>Ocular reactions</b>            | Conjunctiva         | Conjunctivitis                                                      |
|                                    |                     | Limbitis Vascular changes                                           |
|                                    |                     | Limbitis Globular infiltrates                                       |
|                                    | Cornea              | Punctate opacities                                                  |
|                                    | Iris                | No of cells/field                                                   |
|                                    |                     | Flare                                                               |
|                                    |                     | Iris                                                                |
|                                    | Optic disk          | Hyperaemia                                                          |
|                                    |                     | Swelling                                                            |
|                                    |                     | Aspect of optic disk                                                |
|                                    | Peripheral Retina   | Distribution of atrophy                                             |
|                                    |                     | Intensity of Retinal Pigmental Epithelial mottling and % of atrophy |
|                                    |                     | Retinitis                                                           |
|                                    |                     | Cotton wool spots                                                   |
|                                    |                     | Vasculitis                                                          |
|                                    |                     | Haemorrhage                                                         |
|                                    | Eye Pain            | Eye pain                                                            |
|                                    | Eye Pruritus        | Eye pruritus                                                        |
|                                    | Eyelid Swelling     | Eyelid oedema                                                       |
|                                    | Vision              | Photophobia                                                         |
| Visual acuity                      |                     |                                                                     |
| Visual field change                |                     |                                                                     |
| Colour vision                      |                     |                                                                     |
| Blurred vision                     |                     |                                                                     |
| Other ocular<br>Mazzotti reactions | Tearing/watery eyes |                                                                     |
|                                    | Ocular discomfort   |                                                                     |

CS – clinically significant.

### 1.5 Sample size calculation

The distribution and mean pre-treatment skin microfilariae levels which impact the skin microfilariae levels 12 months after ivermectin treatment could not be predicted during study planning since they depend on a number of unknown factors including the level of endemicity in the villages from which participants would be recruited as well as the age and thus life time risk of infection of each participant and area and individual treatment history.

Consequently, sample size calculations to show a 50% difference in arithmetic mean SmfD 12 months after treatment between the two treatment arms took into account data obtained 12 months after ivermectin treatment from two different historical scenarios: the first community study of ivermectin<sup>9</sup> (raw data provided by Dr. H. Remme, 32.49 ± 2.35 mf/snip ) and a study conducted at the OCRC (4.01 ± 2.41 mf/mg skin). We assumed that the Month 12 mean values in the ivermectin arm would be one or the other, with the Month 12 value in the moxidectin arm being half that in the ivermectin arm (16.24 mf/snip and 2.0 mf/mg, respectively) and with the estimate of the common standard deviation being that in the historical scenario (2.35 mf/snip or 2.41 mf/mg, respectively).

Sample size calculation was conducted for both scenarios for the case of a 2-sided test, type I error of 0.05 and power of 90% based on a student t-test and log<sub>e</sub>(y+1) transformed data, taking into account the randomization ratio of 2:1 moxidectin to ivermectin, previously decided upon in view of safety data collection. For the two historical scenarios this yielded a total sample size of 159 (106:53, moxidectin:ivermectin) and 276 (184:92), respectively. Assuming that only 65% of enrolled participants would be available for the 12 months visit and taking into account the planned block size of 6 for randomization, the sample sizes were 246 and 426, respectively. This was judged not to provide a sufficient number of participants for the safety-related part of the primary study objective. The planned sample size was increased to approximately 1000 moxidectin : 500 ivermectin treated participants, which, assuming 65% evaluability (650 moxidectin treated, 325 ivermectin treated participants having Month 12 SmfD data), yielded >99% power to detect a ≥50% treatment difference.



## 1.6 Statistical analysis

### 1.6.1 Statistical methods for primary efficacy endpoint

SmfD were logarithmically transformed ( $y = \log_e(\text{SmfD} + 1)$ ) before analysis. Back transformation was carried out by directly exponentiating least squares means (LSM) as well as the lower and upper confidence limit and subtracting 1.

SmfD 12 months post-treatment was compared with a mixed-effects model as described in the manuscript including sex\*treatment and LoI\*treatment interactions. When no interactions were detected ( $p > 0.05$ ), the interaction term was not considered and the main effects model was used for the primary analysis. When an interaction was detected, adjusted (least square) means were calculated for each combination of the treatments and the sex and LoI categories and compared pairwise to evaluate for which level of the stratification variable there was a statistically significant difference between treatments. For this analysis, no imputations for missing data were made. The mixed model is valid in the presence of missing data, if the missing data can be considered missing at random which was the case: in each treatment group 3% of treated participants did not have a month 12 evaluation.

The model fit was assessed in 2 ways: (1) comparison with a model with intercept only. Here the log-likelihood ratio test was used. (2) choice of the variance-covariance matrix for random effects and for repeated effects was performed by using AIC and BIC. The lower AIC represented the best matrix to choose.

An R-square can be approximated by focusing on percent reduction in variability due to the model where

$$R\text{-square} = 1 - \text{SSE} / \text{SSTOT}$$

with SSE the sum of the squared residuals from the model and SSTOT the sum of squared residuals from an intercept only model:

| Source                   | Sum of Squares |
|--------------------------|----------------|
| Residual Full Model      | 784.50645      |
| Residual Intercept Model | 1682.670887    |
| R square                 | 0.533773       |

By default the structure of the variance – covariance matrix for the repeated measurements part of the model was unstructured (UN). When UN failed to converge, other variance – covariance matrix structures including Toeplitz (TOEP) compound symmetry (CS), variance components (VC) and first-order autoregressive (AR (1)) were considered. Akaike Information Criteria (AIC) was used to choose between them. Two-way interactions were evaluated and analysed when necessary as described for the primary efficacy variable.

As per protocol, a non-parametric model was fitted to the data. It was performed by first transforming the outcome data to Savage ranks and analyzing these transformed data with the same mixed model described in the manuscript for the primary efficacy outcome. As per peer reviewer recommendations, sensitivity analyses were conducted:

- a linear fixed effects model with baseline SmfD, treatment, sex, LoI, treatment\*sex and treatment\*LoI interactions, and site as fixed effects,
- a linear mixed model with % change in skin microfilarial density at 12 months from baseline the outcome variable. Baseline SmfD, treatment, sex, LoI, treatment\*sex, and treatment\*LoI interactions were fixed effects and site the random effect.

### 1.6.2 Analysis populations

The modified intent-to-treat (mITT) population (population for primary efficacy and secondary SmfD based analysis and safety analysis) was defined as all participants who received a single dose of study drug.

The secondary population for efficacy analysis was the efficacy-modified intent-to-treat (e-mITT) population defined as all participants who received treatment and for whom skin microfilariae counts were obtained at baseline and month 12. Since the e-mITT population constituted around 98% of the mITT population, only the results for the mITT population are provided.

## 1.7 Overview of protocol amendments

Study initiation occurred under Amendment 1.

Amendment 2 incorporated clarifications provided previously to the investigators via sponsor memoranda, i.e.

- prohibited prior and concomitant anthelmintics were anti-nematodal drugs,
- protocol-scheduled laboratory determinations should be conducted only with sponsor-provided equipment and back-up equipment, samples preserved if neither was functioning and that other methods



should be used only in the absence of functioning sponsor-provided equipment when the investigator needs the results for safety reasons

- randomization of participants with 20 mf/mg.
- biological samples should be destroyed only after verification of the protocol-specified data by the laboratory head and investigator or designate.

and added immunochromatographic tests during follow up for participants with positive tests for LF at baseline. Amendment 3 was instituted after completion of enrolment in all sites and completion of follow up of all participants enrolled in Liberia to

- update sponsor and sponsor-related information
- eliminate the Month 18 visit for all participants whose Month 18 visit occurred after 31 December 2011 or approval of the amendment by the Ethics Committees in DRC and Ghana and update or clarify all related information and provisions

Furthermore, Amendment 3

- included clarifications which investigators been previously provided with via Sponsor Memoranda (provision of best estimate for number of punctate opacities when ophthalmologists considered accurate counting impossible, application of adverse event criteria to laboratory and ECG findings)
- updated the section on Clinical Experience with moxidectin to include the results of analyses completed for the healthy volunteer studies and the Phase 2 study.

There were no changes in the objectives, or planned sample size or endpoints or the planned analysis of the primary efficacy outcome, i.e. mixed effect models including baseline skin microfilariae density, treatment group, visit, treatment by visit, and stratification variables sex and center.

Before unblinding, center was selected as the random effect for the mixed effect model and the level of infection added to the factors in the mixed effect model.

## 2 Results

### 2.1 Baseline characteristics

#### 2.1.1 Skin microfilariae

**Table S 7: Skin microfilariae density in subgroups defined by level of infection at baseline and presence of palpable nodules pre-treatment**

|                                              | 8 mg moxidectin | Ivermectin |
|----------------------------------------------|-----------------|------------|
| Mean±SD mf/mg skin in those with <20 mf/mg   | 13.9±2.9        | 14.1±2.9   |
| Mean±SD mf/mg skin in those with ≥20 mf/mg   | 48.9±30.9       | 53.0±30.7  |
| No (%) without palpable nodules <sup>a</sup> | 551 (56.3)      | 279 (56.5) |
| No (%) with > 4 nodule sites                 | 44 (4.5)        | 26 (5.3)   |

<sup>a</sup>Palpable nodules were not an inclusion criterion and are not necessarily onchocercal.<sup>10-12</sup>

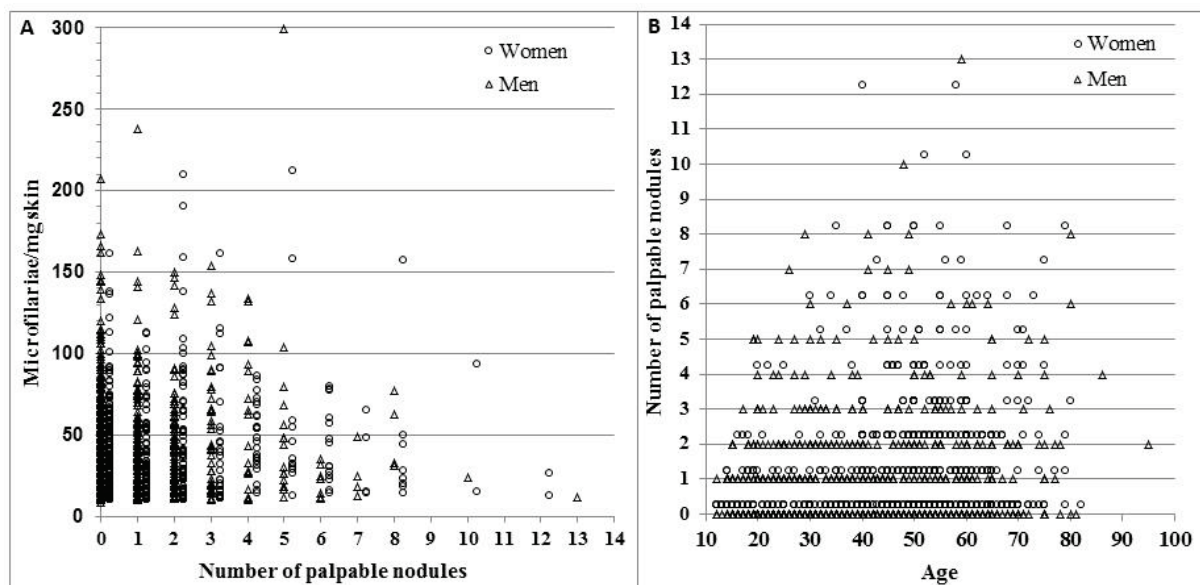

**Figure S 1 A: Number of nodules palpated pre-treatment vs pre-treatment skin microfilariae density by sex of participants; B: Participant age vs. number of palpable nodules pre-treatment.**

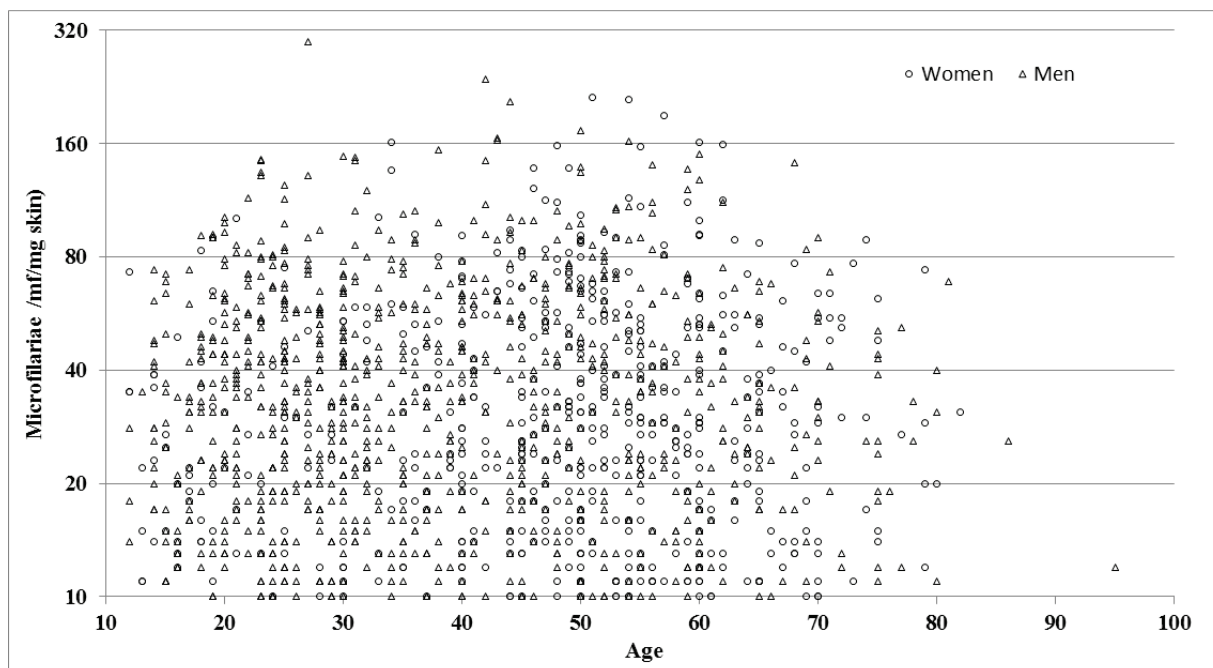

Figure S 2 Skin microfilariae density pre-treatment by age and sex

### 2.1.2 Results of ICT testing pre-treatment

ICT were conducted in Liberia and DRC where LF endemicity was unknown prior to this study. The area from which participants were recruited in Ghana is known not to be LF endemic.

DRC - Nord-Kivu: All 487 tested were ICT negative.

DRC - Nord-Ituri: 466/470 tested were ICT negative. None of three ICT positive who were tested for microfilariae in the blood had detectable levels.

Liberia: 30/299 tested were ICT positive. None had detectable levels of microfilariae in the blood.

### 2.1.3 Intestinal helminth infection pre-treatment

Table S 8: Intestinal helminth infections at baseline by site

| Age           | Nord-Kivu, DRC |     |     |    | Nord-Ituri, DRC |    |     |    | Lofa County, Liberia |     | Nkwanta district, Ghana |    |     |     |    |
|---------------|----------------|-----|-----|----|-----------------|----|-----|----|----------------------|-----|-------------------------|----|-----|-----|----|
|               | <18            |     | ≥18 |    | <18             |    | ≥18 |    | <18                  | ≥18 | <18                     |    | ≥18 |     |    |
| N with data   | 3              |     | 451 |    | 26              |    | 446 |    | 0                    | 283 |                         | 46 |     | 183 |    |
|               | n              | %   | n   | %  | n               | %  | n   | %  |                      | n   | %                       | n  | %   | n   | %  |
| Not infected  | 0              | 0   | 106 | 24 | 11              | 42 | 191 | 43 |                      | 186 | 66                      | 13 | 28  | 77  | 42 |
| Hookworm      | 3              | 100 | 313 | 69 | 10              | 38 | 214 | 48 |                      | 87  | 31                      | 32 | 70  | 103 | 56 |
| Roundworm     | 1              | 33  | 15  | 3  | 1               | 4  | 15  | 3  |                      | 9   | 3                       | 1  | 2   | 2   | 1  |
| Schistosoma   | 1              | 33  | 103 | 23 | 9               | 35 | 85  | 19 |                      | 13  | 5                       | 2  | 4   | 1   | 1  |
| Enterobius    | 0              | 0   | 0   | 0  | 0               | 0  | 2   | 0  |                      | 0   | 0                       | 0  | 0   | 0   | 0  |
| Tapeworm      | 0              | 0   | 0   | 0  | 1               | 4  | 0   | 0  |                      | 0   | 0                       | 0  | 0   | 0   | 0  |
| Strongyloides | 0              | 0   | 0   | 0  | 0               | 0  | 1   | 0  |                      | 3   | 1                       | 0  | 0   | 0   | 0  |
| Whipworm      | 0              | 0   | 11  | 2  | 0               | 0  | 3   | 1  |                      | 0   | 0                       | 1  | 2   | 4   | 2  |
| 1 species     | 1              | 33  | 256 | 57 | 10              | 38 | 193 | 43 |                      | 82  | 29                      | 30 | 65  | 102 | 56 |
| 2 species     | 2              | 67  | 81  | 18 | 4               | 15 | 59  | 13 |                      | 15  | 5                       | 3  | 7   | 4   | 2  |
| 3 species     | 0              | 0   | 8   | 2  | 1               | 4  | 3   | 1  |                      | 0   | 0                       | 0  | 0   | 0   | 0  |

## 2.2 Efficacy data

### 2.2.1 Primary efficacy endpoint (SmfD 12 months post-treatment) analysis with protocol-specified mixed effects model

**Table S 9: Primary efficacy endpoint: Descriptive statistics and protocol-specified mixed-effects model analysis**

Descriptive statistics SmfD across all participants

| Time point | Treatment Group | N   | AM (SD)     | AM 95% CI   | Median (1Q,3Q)    | Min., Max.  | GM ([95% CI])    |
|------------|-----------------|-----|-------------|-------------|-------------------|-------------|------------------|
| BL*        | Moxidectin      | 978 | 38.8 (30.5) | [36.9,40.8] | 31.0 (18.0, 49.0) | 9.0, 299.0  | 30.8 [29.5,32.1] |
|            | Ivermectin      | 494 | 41.2 (31.3) | [38.4,43.9] | 32.0 (17.0, 56.0) | 10.0, 238.0 | 32.2 [30.2,34.3] |
| M12        | Moxidectin      | 947 | 1.2 (3.0)   | [1.0,1.4]   | 0.0 (0.0,1.0)     | 0.0, 28.0   | 0.5 [0.5,0.6]    |
|            | Ivermectin      | 480 | 10.0 (12.9) | [8.8,11.1]  | 5.0 (1.0,13.0)    | 0.0, 77.0   | 5.0 [4.4,5.7]    |

\*p-value = 0.010 for comparison of treatment groups obtained from linear model where SmfD at baseline was the outcome variable with treatment, baseline level of infection (LoI, <20 mf/mg, ≥20 mf/mg skin) and sex as covariates.

Descriptive statistics SmfD by sex

| Time point | Treatment Group | Sex    | N   | AM (SD)     | AM 95% CI   | Median (1Q,3Q)   | Min., Max. | GM (95%CI)       |
|------------|-----------------|--------|-----|-------------|-------------|------------------|------------|------------------|
| BL         | Moxidectin      | Male   | 626 | 39.2 (29.5) | [36.9,41.5] | 31.0 (19.0,49.0) | 9.0,299.0  | 31.5 [29.9,33.2] |
|            |                 | Female | 352 | 38.2 (32.3) | [34.8,41.6] | 27.5 (16.5,50.0) | 10.0,212.0 | 29.6 [27.5,31.9] |
|            | Ivermectin      | Male   | 315 | 43.7 (33.7) | [40.0,47.4] | 33.0 (18.0,60.0) | 10.0,238.0 | 34.0 [31.4,36.8] |
|            |                 | Female | 179 | 36.7 (26.1) | [32.8,40.5] | 29.0 (15.0,53.0) | 10.0,159.0 | 29.2 [26.4,32.3] |
| M12        | Moxidectin      | Male   | 604 | 1.7 (3.5)   | [1.4,1.9]   | 0.0 (0.0,1.0)    | 0.0,28.0   | 0.8 [0.7,0.9]    |
|            |                 | Female | 343 | 0.5 (1.5)   | [0.3,0.6]   | 0.0 (0.0,0.0)    | 0.0,13.0   | 0.2 [0.1,0.3]    |
|            | Ivermectin      | Male   | 306 | 11.1 (13.5) | [9.6,12.6]  | 6.0 (2.0,15.0)   | 0.0,77.0   | 5.7 [4.9,6.6]    |
|            |                 | Female | 174 | 8.1 (11.6)  | [6.3,9.8]   | 3.0 (1.0,10.0)   | 0.0,65.0   | 3.9 [3.2,4.8]    |

Descriptive statistics SmfD by baseline level of infection

| Time point | Treatment Group | LoI       | N   | AM (SD)     | AM 95% CI   | Median (1Q,3Q)   | Min., Max. | GM (95%CI)       |
|------------|-----------------|-----------|-----|-------------|-------------|------------------|------------|------------------|
| BL         | Moxidectin      | <20 mf/mg | 281 | 13.9 (2.9)  | [13.6,14.3] | 13.0 (11.0,16.0) | 9.0,19.0   | 13.7 [13.4,14.0] |
|            |                 | ≥20 mf/mg | 697 | 48.9 (30.9) | [46.6,51.2] | 40.0 (28.0,60.0) | 20.0,299.0 | 42.4 [40.8,44.1] |
|            | Ivermectin      | <20 mf/mg | 150 | 14.1 (2.9)  | [13.6,14.5] | 14.0 (11.0,17.0) | 10.0,19.0  | 13.8 [13.3,14.2] |
|            |                 | ≥20 mf/mg | 344 | 53.0 (30.7) | [49.7,56.2] | 46.0 (30.0,66.5) | 20.0,238.0 | 46.3 [43.8,48.9] |
| M12        | Moxidectin      | <20 mf/mg | 270 | 0.4 (1.0)   | [0.2,0.5]   | 0.0 (0.0,0.0)    | 0.0,8.0    | 0.2 [0.1,0.3]    |
|            |                 | ≥20 mf/mg | 677 | 1.6 (3.4)   | [1.3,1.8]   | 0.0 (0.0,1.0)    | 0.0,28.0   | 0.7 [0.6,0.8]    |
|            | Ivermectin      | <20 mf/mg | 148 | 3.4 (6.0)   | [2.5,4.4]   | 2.0 (1.0,4.0)    | 0.0,58.0   | 1.9 [1.6,2.4]    |
|            |                 | ≥20 mf/mg | 332 | 12.9 (14.1) | [11.4,14.4] | 8.0 (3.0,18.0)   | 0.0,77.0   | 7.3 [6.4,8.3]    |

Mixed-effects model output

| Time point | Treatment Group | N   | Adjusted AM [95% CI] | Difference adjusted AM [95% CI] | AGM [95% CI]  | Difference of AGM [95% CI] | Difference AGM in % AGM IVM | p-value <sup>d</sup> |
|------------|-----------------|-----|----------------------|---------------------------------|---------------|----------------------------|-----------------------------|----------------------|
| M12        | Moxidectin      | 947 | 0.5 [0.3,0.7]        | 1.2 [1.1,1.3]                   | 0.6 [0.3,1.0] | 3.9 [3.2,4.9]              | 86.4                        | <0.0001              |
|            | Ivermectin      | 480 | 1.7 [1.5,1.9]        |                                 | 4.5 [3.5,5.9] |                            |                             |                      |

<sup>d</sup> p-value obtained from mixed-effects model, with baseline SmfD, treatment, sex, LoI, treatment\*sex and treatment\*LoI interactions as fixed effects and site as random effect.

Test of interactions: Treatment group \* Sex: p-value= 0.0993, Treatment group \* LoI at baseline: p <0.0001

Mixed-effects model output by sex and baseline level of infection (LoI)

| Treatment  | Results by | Adjusted AM [95% CI] | Difference of Adjusted AM [95% CI] | AGM [95% CI]  | Difference of AGM [95% CI] | Difference between AGM in % AGM IVM | p-value <sup>ao</sup> |
|------------|------------|----------------------|------------------------------------|---------------|----------------------------|-------------------------------------|-----------------------|
|            | <b>Sex</b> |                      |                                    |               |                            |                                     |                       |
| Moxidectin | FEMALE     | 0.3 [0.1;0.5]        |                                    | 0.4 [0.1;0.7] |                            |                                     |                       |
| Ivermectin | FEMALE     | 1.6 [1.4;1.8]        | 1.3 [1.2;1.4]                      | 4.0 [3.0;5.4] | 3.7 [2.9;4.7]              | 90.8                                | <0.0001               |
| Moxidectin | MALE       | 0.7 [0.4;0.9]        |                                    | 0.9 [0.5;1.4] |                            |                                     |                       |
| Ivermectin | MALE       | 1.8 [1.6;2.0]        | 1.2 [1.0;1.3]                      | 5.1 [3.9;6.6] | 4.2 [3.3;5.2]              | 82.0                                | <0.0001               |
|            | <b>LoI</b> |                      |                                    |               |                            |                                     |                       |
| Moxidectin | < 20 mf/mg | 0.6 [0.4;0.9]        |                                    | 0.9 [0.5;1.4] |                            |                                     |                       |
| Ivermectin | < 20 mf/mg | 1.5 [1.3;1.8]        | 0.9 [0.8;1.1]                      | 3.7 [2.7;5.0] | 2.8 [2.2;3.6]              | 75.6                                | <0.0001               |
| Moxidectin | ≥ 20 mf/mg | 0.3 [0.1;0.5]        |                                    | 0.4 [0.1;0.7] |                            |                                     |                       |
| Ivermectin | ≥ 20 mf/mg | 1.9 [1.7;2.1]        | 1.6 [1.5;1.7]                      | 5.5 [4.2;7.1] | 5.2 [4.1;6.4]              | 93.1                                | <0.0001               |

<sup>a</sup> p-value obtained from least square means pairwise comparisons based on the mixed-effect model.

Abbreviations: AM Arithmetic mean, BL pre-treatment/baseline, AGM adjusted Geometric Means, GM geometric mean, M12 Month 12, SD standard deviation

## 2.2.2 Protocol-planned non-parametric analysis of primary efficacy endpoint (SmfD 12 months post-treatment)

P value of non parametric model for treatment difference:  $p < 0.0001$ . Interaction treatment \* Sex:  $p = 0.4250$ , Interaction treatment \* level of infection at baseline:  $p < 0.0001$ .

## 2.2.3 Sensitivity analysis of primary efficacy endpoint in response to statistical peer review: Fixed effects model

**Table S 10: Primary efficacy endpoint: Fixed effects model sensitivity analysis output**

Model output

| Time point | Treatment Group | N   | Adjusted AM [95% CI] | Difference adjusted AM [95% CI] | AGM [95% CI]  | Difference of AGM [95% CI] | Difference AGM in % AGM IVM | p-value <sup>d</sup> |
|------------|-----------------|-----|----------------------|---------------------------------|---------------|----------------------------|-----------------------------|----------------------|
| M12        | Moxidectin      | 947 | 0.5 [0.4;0.5]        | 1.2 [1.1;1.3]                   | 0.6 [0.3;0.7] | 3.9 [3.6;4.3]              | 86.4                        | <0.0001              |
|            | Ivermectin      | 480 | 1.7 [1.6;1.8]        |                                 | 4.5 [4.1;5.0] |                            |                             |                      |

<sup>d</sup> p-value obtained from fixed-effects model, with baseline SmfD, treatment, sex, LoI, treatment\*sex and treatment\*LoI interactions and site as fixed effects.

Test of interactions: Treatment group \* Sex:  $p = 0.1001$ , Treatment group \* LoI at baseline:  $p < 0.0001$

Fixed effects model output by sex and baseline level of infection (LoI)

| Treatment  | Results by | Adjusted AM [95% CI] | Difference adjusted AM [95% CI] | AGM [95% CI]  | Difference of AGM [95% CI] | Difference AGM in % AGM IVM | p-value <sup>eo</sup> |
|------------|------------|----------------------|---------------------------------|---------------|----------------------------|-----------------------------|-----------------------|
|            | <b>Sex</b> |                      |                                 |               |                            |                             |                       |
| Moxidectin | FEMALE     | 0.3 [0.2;0.4]        |                                 | 0.4 [0.3;0.5] |                            |                             |                       |
| Ivermectin | FEMALE     | 1.6 [1.5;1.7]        | 1.3 [1.2;1.4]                   | 4.0 [3.5;4.7] | 3.7 [3.2;4.2]              | 90.8                        | <0.0001               |
| Moxidectin | MALE       | 0.7 [0.6;0.7]        |                                 | 0.9 [0.8;1.1] |                            |                             |                       |
| Ivermectin | MALE       | 1.8 [1.7;1.9]        | 1.2 [1.0;1.3]                   | 5.1 [4.6;5.7] | 4.2 [3.8;4.6]              | 82.0                        | <0.0001               |
|            | <b>LoI</b> |                      |                                 |               |                            |                             |                       |
| Moxidectin | < 20 mf/mg | 0.6 [0.5;0.8]        |                                 | 0.9 [0.7;1.1] |                            |                             |                       |
| Ivermectin | < 20 mf/mg | 1.5 [1.4;1.7]        | 0.9 [0.8;1.1]                   | 3.7 [3.1;4.4] | 2.8 [2.4;3.3]              | 75.6                        | <0.0001               |
| Moxidectin | ≥ 20 mf/mg | 0.3 [0.3;0.4]        |                                 | 0.4 [0.3;0.5] |                            |                             |                       |
| Ivermectin | ≥ 20 mf/mg | 1.9 [1.8;2.0]        | 1.6 [1.5;1.7]                   | 5.5 [5.0;6.2] | 5.2 [4.7;5.7]              | 93.1                        | <0.0001               |

a p-value obtained from least square means pairwise comparisons based on the fixed-effect model.

Abbreviations: AM Arithmetic mean, AGM adjusted Geometric Means, IVM ivermectin

## 2.2.4 Sensitivity analysis in response to statistical peer review: Descriptive statistics and linear mixed model of percentage SmfD change from baseline at month 12

**Table S 11: Descriptive statistics and linear mixed model analysis output for percentage SmfD change from baseline at month 12**

Descriptive statistics for SmfD change from baseline to 12 months post-treatment in percent of baseline SmfD

| Time point | Treatment Group | N   | AM (SD)     | AM 95% CI   | Median (IQR)      | Min., Max. |
|------------|-----------------|-----|-------------|-------------|-------------------|------------|
| M12        | Moxidectin      | 947 | 96.8 (7.4)  | [96.3;97.3] | 99.7 (97.4;100.0) | 41.5;100.0 |
|            | Ivermectin      | 480 | 76.5 (28.9) | [73.9;79.1] | 84.7 (68.1;94.0)  | -276;100.0 |

Model output

| Time point | Treatment Group | N   | Adjusted AM [95% CI] | Difference adjusted AM [95% CI]* | Difference Adj AM % Adj AM IVM | p-value <sup>e</sup> |
|------------|-----------------|-----|----------------------|----------------------------------|--------------------------------|----------------------|
| M12        | Moxidectin      | 947 | 96.8 [93.1;100.5]    |                                  |                                |                      |
|            | Ivermectin      | 480 | 76.6 [72.7;80.5]     | 20.2 [18.1;22.4]                 | 26.4                           | <0.0001              |

Test of interactions: Treatment group \* Sex:  $p = 0.2724$ , Treatment group \* LoI at baseline:  $p = 0.4981$

Model output by sex and baseline level of infection (LoI)

| Treatment  | Results by | Adjusted AM [95% CI] | Difference of Adjusted AM [95% CI]* | p-value <sup>eo</sup> |
|------------|------------|----------------------|-------------------------------------|-----------------------|
|            | <b>Sex</b> |                      |                                     |                       |
| Moxidectin | FEMALE     | 98.2 [94.2;102.2]    |                                     |                       |
| Ivermectin | FEMALE     | 79.1 [74.7;83.5]     | 19.1 [15.9;22.4]                    | <0.0001               |
| Moxidectin | MALE       | 95.4 [91.6;99.2]     |                                     |                       |
| Ivermectin | MALE       | 74.0 [70.0;78.1]     | 21.4 [18.8;23.9]                    | <0.0001               |
|            | <b>LoI</b> |                      |                                     |                       |
| Moxidectin | < 20 mf/mg | 96.7 [92.3;101.1]    |                                     |                       |
| Ivermectin | < 20 mf/mg | 75.7 [70.9;80.5]     | 21.0 [17.4;24.5]                    | <0.0001               |
| Moxidectin | ≥ 20 mf/mg | 96.9 [93.1;100.7]    |                                     |                       |
| Ivermectin | ≥ 20 mf/mg | 77.4 [73.3;81.4]     | 19.5 [17.1;21.9]                    | <0.0001               |

<sup>e</sup> p-value obtained from with % change from baseline at month 12 as outcome and with baseline SmfD, treatment, sex, LoI, treatment\*sex and treatment\*LoI interactions as fixed effects and site as random effect

\*Difference in adjusted AM calculated as Adjusted AM Moxidectin - Adjusted AM Ivermectin. Note: for all other models the difference in adjusted AM and GM was calculated as Adjusted AM Ivermectin - Adjusted AM Moxidectin.

Abbreviations: AM Arithmetic mean.

## 2.2.5 Secondary efficacy endpoints

**Table S 12: Skin microfilariae density 1, 6, 12 and 18 months after treatment: Descriptive statistics and mixed effects model output**

Descriptive statistics

| Time point | Treatment  | N   | Raw AM (SD) | Raw 95% CI   | Raw Median (IQ,3Q) | Raw Min., Max. | Geometric Mean [95% CI] |
|------------|------------|-----|-------------|--------------|--------------------|----------------|-------------------------|
| Baseline   | Moxidectin | 978 | 38.8 (30.5) | [36.9, 40.8] | 31.0 (18.0, 49.0)  | 9.0, 299.0     | 30.8 [29.5,32.1]        |
|            | Ivermectin | 494 | 41.2 (31.3) | [38.4, 43.9] | 32.0 (17.0, 56.0)  | 10.0, 238.0    | 32.2 [30.2,34.3]        |
| Month 1    | Moxidectin | 973 | 0.1 (0.5)   | [0.0, 0.1]   | 0.0 (0.0, 0.0)     | 0.0, 8.0       | 0.0 [0.0,0.0]           |
|            | Ivermectin | 492 | 2.3 (7.2)   | [1.7, 2.9]   | 0.0 (0.0, 1.0)     | 0.0, 54.0      | 0.7 [0.6,0.8]           |
| Month 6    | Moxidectin | 962 | 0.0 (0.1)   | [0.0, 0.0]   | 0.0 (0.0, 0.0)     | 0.0, 2.0       | 0.0 [0.0,0.0]           |
|            | Ivermectin | 491 | 3.6 (6.2)   | [3.1, 4.2]   | 1.0 (0.0, 4.0)     | 0.0, 43.0      | 1.8 [1.5,2.0]           |
| Month 12   | Moxidectin | 947 | 1.2 (3.0)   | [1.0, 1.4]   | 0.0 (0.0, 1.0)     | 0.0, 28.0      | 0.5 [0.5,0.6]           |
|            | Ivermectin | 480 | 10.0 (12.9) | [8.8, 11.1]  | 5.0 (1.0, 13.0)    | 0.0, 77.0      | 5.0 [4.4,5.7]           |
| Month 18   | Moxidectin | 764 | 4.3 (8.7)   | [3.6, 4.9]   | 1.0 (0.0, 4.0)     | 0.0, 71.0      | 1.6 [1.4,1.8]           |
|            | Ivermectin | 386 | 15.3 (18.3) | [13.5, 17.2] | 8.0 (2.0, 21.0)    | 0.0, 101.0     | 7.7 [6.7,8.8]           |

Mixed effects model output by time post treatment

| Treatment Group | Time post-treatment | Adjusted AM [95% CI] | Difference of Adjusted AM [95% CI] | AGM [95% CI]   | Difference of AGM [95% CI] | Difference between AGM in % AGM IVM | p-value <sup>a</sup> |
|-----------------|---------------------|----------------------|------------------------------------|----------------|----------------------------|-------------------------------------|----------------------|
| Moxidectin      | Month 1             | 0.1 [-0.1;0.2]       | 0.4 [0.3;0.5]                      | 0.1 [-0.1;0.3] | 0.6 [0.5;0.7]              | 86.2                                | <0.0001              |
| Ivermectin      | Month 1             | 0.5 [0.3;0.7]        |                                    | 0.7 [0.4;0.9]  |                            |                                     |                      |
| Moxidectin      | Month 6             | 0.1 [-0.1;0.2]       | 0.9 [0.9;1.0]                      | 0.1 [-0.1;0.2] | 1.6 [1.4;1.9]              | 96.8                                | <0.0001              |
| Ivermectin      | Month 6             | 1.0 [0.8;1.1]        |                                    | 1.7 [1.3;2.2]  |                            |                                     |                      |
| Moxidectin      | Month 12            | 0.5 [0.3;0.6]        | 1.3 [1.2;1.3]                      | 0.6 [0.4;0.9]  | 4.1 [3.5;4.8]              | 86.6                                | <0.0001              |
| Ivermectin      | Month 12            | 1.7 [1.6;1.9]        |                                    | 4.7 [3.9;5.7]  |                            |                                     |                      |
| Moxidectin      | Month 18            | 1.0 [0.9;1.2]        | 1.1 [1.0;1.2]                      | 1.8 [1.4;2.3]  | 5.6 [4.7;6.6]              | 75.6                                | <0.0001              |
| Ivermectin      | Month 18            | 2.1 [2.0;2.3]        |                                    | 7.4 [6.1;8.9]  |                            |                                     |                      |

Model output by level of infection at baseline (LoI)

| Treatment Group | LoI        | Adjusted AM [95% CI] | Difference of Adjusted AM [95% CI] | AGM [95% CI]  | Difference of AGM [95% CI] | Difference between AGM in % AGM IVM | p-value <sup>a</sup> |
|-----------------|------------|----------------------|------------------------------------|---------------|----------------------------|-------------------------------------|----------------------|
| Moxidectin      | < 20 mf/mg | 0.5 [0.4;0.7]        | 0.7 [0.6;0.8]                      | 0.7 [0.4;1.0] | 1.8 [1.5;2.2]              | 72.0                                | <0.0001              |
| Ivermectin      | < 20 mf/mg | 1.3 [1.1;1.4]        |                                    | 2.5 [2.0;3.2] |                            |                                     |                      |
| Moxidectin      | ≥ 20 mf/mg | 0.3 [0.1;0.4]        | 1.1 [1.1;1.2]                      | 0.3 [0.1;0.6] | 2.8 [2.4;3.3]              | 89.2                                | <0.0001              |
| Ivermectin      | ≥ 20 mf/mg | 1.4 [1.3;1.6]        |                                    | 3.1 [2.5;3.8] |                            |                                     |                      |

Tests of Interaction: Treatment \* sex: p-value=0.1652, Treatment \* LoI p-value <0.0001, Treatment \* Time point p-value <0.0001, obtained from a mixed-effects model with repeated measures with baseline SmfD, sex, LoI, treatment, time, treatment\*sex, treatment\*LoI and treatment\*time interaction as fixed effects, time as repeated effect for the 4 SmfD measurements with subject as classification level.

<sup>a</sup> p-value obtained from least square means two-way comparisons based on the mixed-effects model.

Abbreviations: AM Arithmetic mean, AGM Adjusted Geometric Mean, GM Geometric mean,

**Table S 13: Percentage SmfD change from baseline of skin microfilariae density 1, 6, 12 and 18 months after treatment: Descriptive statistics**

| Time point | Treatment Group | N   | AM (SD)     | AM 95% CI     | Median (IQ,3Q)       | Min., Max.   |
|------------|-----------------|-----|-------------|---------------|----------------------|--------------|
| Month 1    | Moxidectin      | 973 | 99.8 (0.6)  | [99.8, 99.9]  | 100.0 (100.0, 100.0) | 91.9, 100.0  |
|            | Ivermectin      | 492 | 93.9 (16.2) | [92.5, 95.4]  | 99.6 (96.6, 100.0)   | -49.6, 100.0 |
| Month 6    | Moxidectin      | 962 | 99.9 (0.4)  | [99.9, 100.0] | 100.0 (100.0, 100.0) | 91.5, 100.0  |
|            | Ivermectin      | 491 | 90.9 (15.0) | [89.6, 92.3]  | 95.8 (89.5, 98.8)    | -59.3, 100.0 |
| Month 12   | Moxidectin      | 947 | 96.8 (7.4)  | [96.3, 97.3]  | 99.7 (97.4, 100.0)   | 41.5, 100.0  |
|            | Ivermectin      | 480 | 76.5 (28.9) | [73.9, 79.1]  | 84.7 (68.1, 94.0)    | -276, 100.0  |
| Month 18   | Moxidectin      | 764 | 89.1 (19.9) | [87.7, 90.5]  | 96.9 (87.0, 100.0)   | -78.2, 100.0 |
|            | Ivermectin      | 386 | 64.0 (35.3) | [60.5, 67.6]  | 73.5 (49.5, 89.5)    | -130, 100.0  |

AM Arithmetic mean, SD Standard deviation, 95% CI 95% Confidence interval,

**Table S 14: Proportion (%) of participants with undetectable levels of skin microfilariae 1, 6, 12 and 18 months after treatment: Descriptive statistics and adjusted odds ratios**

| Time point | Treatment Group | Participants with undetectable microfilariae / participants with data | % with undetectable skin microfilariae | Odds Ratio [95% CI] <sup>1</sup> | Odds Ratio [95% CI] <sup>2</sup> | p-value <sup>3</sup> |
|------------|-----------------|-----------------------------------------------------------------------|----------------------------------------|----------------------------------|----------------------------------|----------------------|
| Month 1    | Moxidectin      | 813/973                                                               | 83.6%                                  | 0.1287 [0.0995; 0.1667]          |                                  | <0.0001              |
|            | Ivermectin      | 208/492                                                               | 42.3%                                  |                                  | 7.77 [6.00; 10.05]               |                      |
| Month 6    | Moxidectin      | 881/962                                                               | 91.6%                                  | 0.0070 [0.0045; 0.0109]          |                                  | <0.0001              |
|            | Ivermectin      | 54/491                                                                | 11.0%                                  |                                  | 141.9 [91.36; 220.4]             |                      |
| Month 12   | Moxidectin      | 440/947                                                               | 46.5%                                  | 0.0424 [0.0268; 0.0670]          |                                  | <0.0001              |
|            | Ivermectin      | 24/480                                                                | 5.0%                                   |                                  | 23.59 [14.92; 37.30]             |                      |
| Month 18   | Moxidectin      | 215/764                                                               | 28.1%                                  | 0.0926 [0.0539; 0.1589]          |                                  | <0.0001              |
|            | Ivermectin      | 16/386                                                                | 4.1%                                   |                                  | 10.80 [6.29; 18.55]              |                      |

<sup>1</sup> Odds for undetectable SmfD after ivermectin treatment relative to odds for undetectable SmfD after moxidectin treatment obtained from the mixed effects logistic regression, see below.

<sup>2</sup> Odds for undetectable SmfD after moxidectin treatment relative to odds for undetectable SmfD after ivermectin treatment obtained from the mixed effects logistic regression, see below.

<sup>3</sup> p-values from mixed effects logistic model where undetectable skin microfilariae level (yes/no) is the outcome with treatment, sex and LoI as fixed effect and study site as random effect for each follow-up time point (1, 6, 12, 18 months).

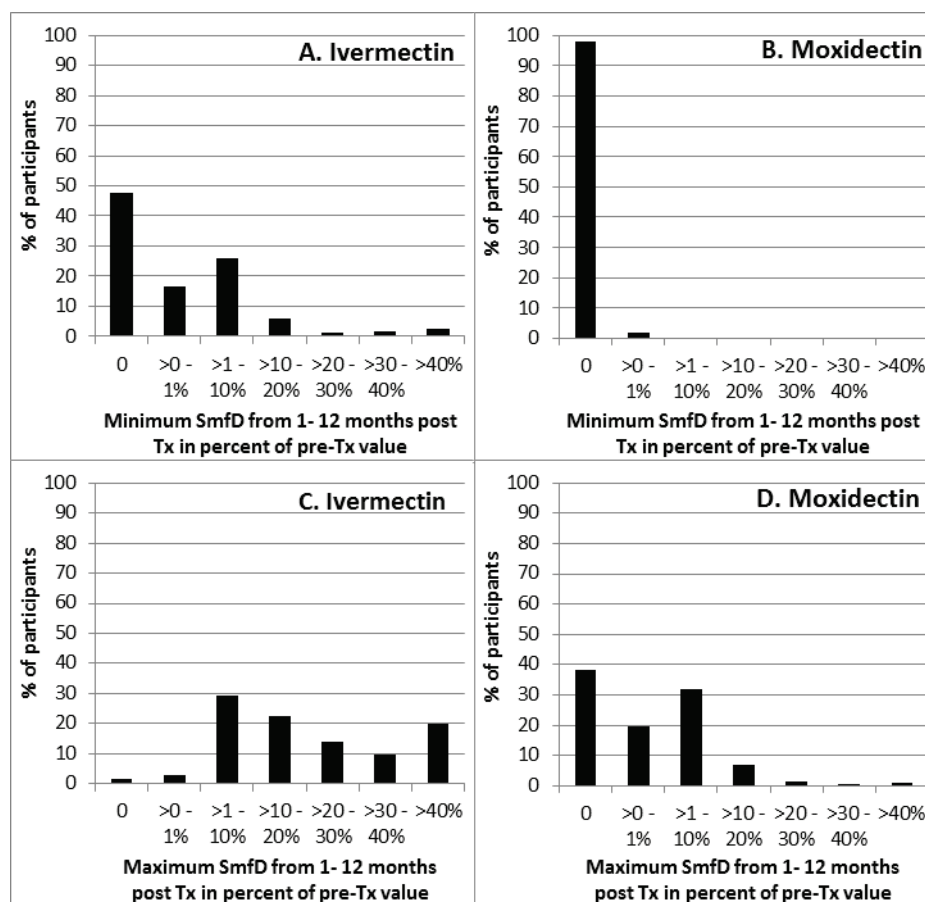

**Figure S 3 Percentage of participants with 1, 6, and 12 months follow up data treated with ivermectin (A, C, n=478) and moxidectin (B, D, n=938) by minimum (A, B) and maximum (C, D) skin microfilariae densities between 1 and 12 months in percent of pre-treatment skin microfilariae density**



**Table S 15: Microfilariae levels in the anterior chamber 12 months post treatment among participants with > 10 mf across both anterior chambers at baseline and Month 12 data for both eyes: Descriptive statistics**

| Time point | Treatment Group | Number of participants | Raw Mean (SD) | Raw 95% CI  | Raw Median (1Q, 3Q) | Raw Min, Max | Raw Geometric Mean [95% CI] |
|------------|-----------------|------------------------|---------------|-------------|---------------------|--------------|-----------------------------|
| Baseline   | Moxidectin      | 131                    | 26.4 (19.9)   | [22.9,29.8] | 21.0 (14.0,28.0)    | 11.0,102.0   | 22.2 [20.1,24.4]            |
|            | Ivermectin      | 74                     | 26.4 (18.5)   | [22.1,30.7] | 18.0 (14.0,33.0)    | 11.0,92.0    | 22.1 [19.4,25.3]            |
| Day 3 or 4 | Moxidectin      | 131                    | 20.3 (19.3)   | [17.0,23.7] | 16.0 (9.0,24.0)     | 0.0,100.0    | 13.5 [11.2,16.2]            |
|            | Ivermectin      | 74                     | 26.0 (22.8)   | [20.7,31.3] | 17.5 (12.0,30.0)    | 2.0,120.0    | 19.6 [16.4,23.4]            |
| Month 1    | Moxidectin      | 130                    | 4.7 (10.9)    | [2.8,6.6]   | 0.0 (0.0,4.0)       | 0.0,51.0     | 1.1 [0.7,1.6]               |
|            | Ivermectin      | 74                     | 8.5 (17.6)    | [4.4,12.5]  | 0.0 (0.0,8.0)       | 0.0,100.0    | 1.9 [1.1,3.0]               |
| Month 6    | Moxidectin      | 130                    | 0.5 (2.4)     | [0.1,0.9]   | 0.0 (0.0,0.0)       | 0.0,20.0     | 0.2 [0.1,0.3]               |
|            | Ivermectin      | 74                     | 0.9 (5.8)     | [0.4,2.3]   | 0.0 (0.0,0.0)       | 0.0,49.0     | 0.1 [0.0,0.3]               |
| Month 12   | Moxidectin      | 131                    | 0.3 (2.2)     | [0.1,0.7]   | 0.0 (0.0,0.0)       | 0.0,22.0     | 0.1 [0.0,0.1]               |
|            | Ivermectin      | 74                     | 1.2 (6.4)     | [0.3,2.7]   | 0.0 (0.0,0.0)       | 0.0,54.0     | 0.2 [0.1,0.4]               |
| Month 18   | Moxidectin      | 115                    | 0.1 (0.6)     | [0.0,0.2]   | 0.0 (0.0,0.0)       | 0.0,6.0      | 0.0 [0.0,0.1]               |
|            | Ivermectin      | 61                     | 1.7 (10.1)    | [0.9,4.3]   | 0.0 (0.0,0.0)       | 0.0,77.0     | 0.2 [0.0,0.5]               |

**Table S 16: Reduction (%) from baseline of microfilariae levels in the anterior chamber 12 months post treatment among participants with > 10 mf across both anterior chambers at baseline and Month 12 data for both eyes): Descriptive statistics and model output**

| Time point | Treatment Group | N   | Reduction (%) Mean(SD) | Reduction (%) [95% CI] | Reduction (%) Median(1Q, 3Q) | Reduction (%) Min, Max | Adjusted Mean Change from Baseline [95% CI] | Diff Adjusted Mean Change [95% CI] | p-Value |
|------------|-----------------|-----|------------------------|------------------------|------------------------------|------------------------|---------------------------------------------|------------------------------------|---------|
| Month 12   | Moxidectin      | 131 | -99.3 (4.4)            | [-100,-98.6]           | -100 (-100,-100)             | -100,-57.1             | -98.5 [-101,-95.7]                          | -1.9 [-4.4;0.5]                    | 0.1259  |
|            | Ivermectin      | 74  | -97.3 (11.9)           | [-100,-94.5]           | -100 (-100,-100)             | -100,-3.6              | -96.5 [-99.5,-93.6]                         |                                    |         |

p-value obtained from mixed effect model model with sex, LoI, treatment, treatment\*sex and treatment\*LoI interactions as fixed effects and site as random effect.

Test of interaction: Treatment group \* Sex: p-value= 0.0708, Treatment group \* LoI: p-value= 0.2777

## 2.3 Safety data

### 2.3.1 Serious Adverse Events

The table below shows the number of participants who experienced an SAE within 6 months of treatment. The total number of SAEs was 39 in the moxidectin group and 18 in the ivermectin group.

**Table S 17: Serious adverse events (SAEs) during the first 6 months post treatment (MedDRA coding)**

| MedDRA system organ class                      | MedDRA preferred term       | Moxidectin (N=978) |     | Ivermectin (N=494) |     |     |
|------------------------------------------------|-----------------------------|--------------------|-----|--------------------|-----|-----|
|                                                |                             | n                  | (%) | n                  | (%) |     |
| Infections and infestations                    | Abdominal abscess           | 0                  |     | 1                  | 0.2 |     |
|                                                | Abscess limb                | 1                  | 0.1 | 0                  |     |     |
|                                                | Cellulitis                  | 1                  | 0.1 | 0                  |     |     |
|                                                | Fungal skin infection       | 1                  | 0.1 | 0                  |     |     |
|                                                | Gastroenteritis             | 2                  | 0.2 | 0                  |     |     |
|                                                | Malaria                     | 15                 | 1.5 | 9                  | 1.8 |     |
|                                                | Peritonitis                 | 1                  | 0.1 | 0                  |     |     |
|                                                | Pneumonia                   | 1                  | 0.1 | 1                  | 0.2 |     |
|                                                | Respiratory tract infection | 0                  |     | 2                  | 0.4 |     |
|                                                | Sepsis                      | 0                  |     | 1                  | 0.2 |     |
|                                                | Shigella infection          | 1                  | 0.1 | 0                  |     |     |
|                                                | Gastrointestinal disorders  | Abdominal pain     | 1   | 0.1                | 0   |     |
| Abdominal pain lower                           |                             | 1                  | 0.1 | 0                  |     |     |
| Abdominal pain upper                           |                             | 0                  |     | 1                  | 0.2 |     |
| Diarrhoea                                      |                             | 1                  | 0.1 | 3                  | 0.6 |     |
| Enteritis                                      |                             | 2                  | 0.2 | 0                  |     |     |
| Gastritis                                      |                             | 2                  | 0.2 | 1                  | 0.2 |     |
| Haematemesis                                   |                             | 1                  | 0.1 | 0                  |     |     |
| Injury, poisoning and procedural complications |                             | Alcohol poisoning  | 1   | 0.1                | 0   |     |
|                                                |                             | Clavicle fracture  | 1   | 0.1                | 0   |     |
|                                                |                             | Contusion          | 0   |                    | 1   | 0.2 |
|                                                | Head injury                 | 1                  | 0.1 | 0                  |     |     |
|                                                | Limb injury                 | 1                  | 0.1 | 0                  |     |     |
|                                                | Snake bite                  | 1                  | 0.1 | 0                  |     |     |
|                                                | Splenic rupture             | 1                  | 0.1 | 0                  |     |     |

| MedDRA system organ class                          | MedDRA preferred term                     | Moxidectin (N=978) | Ivermectin (N=494) |
|----------------------------------------------------|-------------------------------------------|--------------------|--------------------|
| Nervous system disorders                           |                                           | 3 0.3              | 1 0.2              |
|                                                    | Diabetic ketoacidotic hyperglycaemic coma | 0                  | 1 0.2              |
|                                                    | Hemiplegia                                | 1 0.1              | 0                  |
|                                                    | Loss of consciousness                     | 2 0.2              | 0                  |
|                                                    | Meningism                                 | 0                  | 1 0.2              |
|                                                    | Cardiac disorders                         | 2 0.2              | 0                  |
|                                                    | Cardiac arrest                            | 1 0.1              | 0                  |
| General disorders & administration site conditions | Cardiac failure congestive                | 1 0.1              | 0                  |
|                                                    |                                           | 0                  | 2 0.4              |
|                                                    | Chills                                    | 0                  | 1 0.2              |
| Respiratory, thoracic and mediastinal disorders    | Influenza like illness                    | 0                  | 1 0.2              |
|                                                    |                                           | 1 0.1              | 1 0.2              |
|                                                    | Asthma                                    | 1 0.1              | 0                  |
| Eye disorders                                      | Cough                                     | 0                  | 1 0.2              |
|                                                    |                                           | 1 0.1              | 0                  |
| Hepatobiliary disorders                            | Macular hole                              | 1 0.1              | 0                  |
|                                                    |                                           | 1 0.1              | 0                  |
| Metabolism and nutrition disorders                 | Hepatitis chronic active                  | 1 0.1              | 0                  |
|                                                    |                                           | 1 0.1              | 0                  |
| Musculoskeletal and connective tissue disorders    | Dehydration                               | 1 0.1              | 0                  |
|                                                    |                                           | 1 0.1              | 0                  |
| Reproductive system and breast disorders           | Rheumatic disorder                        | 1 0.1              | 0                  |
|                                                    |                                           | 1 0.1              | 0                  |
| Skin and subcutaneous tissue disorders             | Dysmenorrhoea                             | 1 0.1              | 0                  |
|                                                    |                                           | 1 0.1              | 0                  |
|                                                    | Skin ulcer                                | 1 0.1              | 0                  |

### 2.3.2 Adverse events reported as resulting in Death (MedDRA coding)

Among moxidectin treated participants 2/978 (0.2%) and among ivermectin treated participants 2/494 (0.4%) died within 6 months of treatment. None of the AEs resulting in death (Table below) were assessed as related to study drug or Mazzotti reactions by the investigator.

**Table S 18: Narratives generated from SAE reports for AEs with outcome death**

|                                                                                                                                                                                                                                                                                                                                                                                                                                                                                                                                                                                                                                                                                                                                                                                                                                                                                                                                                                                                                                                                                                                                                                                                                                                                                                                                                                                                                                                                                                                                                                                                                                                                                                                                                                                                                                                                                                                                                                                                                                     |
|-------------------------------------------------------------------------------------------------------------------------------------------------------------------------------------------------------------------------------------------------------------------------------------------------------------------------------------------------------------------------------------------------------------------------------------------------------------------------------------------------------------------------------------------------------------------------------------------------------------------------------------------------------------------------------------------------------------------------------------------------------------------------------------------------------------------------------------------------------------------------------------------------------------------------------------------------------------------------------------------------------------------------------------------------------------------------------------------------------------------------------------------------------------------------------------------------------------------------------------------------------------------------------------------------------------------------------------------------------------------------------------------------------------------------------------------------------------------------------------------------------------------------------------------------------------------------------------------------------------------------------------------------------------------------------------------------------------------------------------------------------------------------------------------------------------------------------------------------------------------------------------------------------------------------------------------------------------------------------------------------------------------------------------|
| <p>The past medical history of this 63 year old woman showed abdominal pain upper (since 23-Dec-2010) and peptic ulcer.</p> <p>She received <b>ivermectin</b> on 8 January 2010.</p> <p>3 days before hospitalisation on 21 Mar 2010, she was reported to have difficulty in walking, fever, headache and pain in the lower limbs. On 21-Mar-2010 the patient was diagnosed with malaria and hospitalized. She was treated with quinine and paracetamol. On 22-Mar-2010, she developed meningeal syndrome (meningeal disorder) with symptoms of vomiting, neck stiffness, disorientation, psychomotor agitation and coma Grade II. She was treated with chloramphenicol. Thiamine was used as adjuvant treatment. On 23-Mar-2010 additional treatment medications were introduced and included ceftriaxone and dexamethasone. On 24-Mar-2010 the patient was diagnosed with diabetic acidotic coma and treatment with hydergine, tribexfort, bicarbonate and insulin were added. Thiamine was discontinued. On 25-Mar-2010 oxygen therapy was added and the patient remained in a coma.</p> <p>Test results:</p> <p>22-Mar-2010: white blood cell count (<math>3.45 \times 10^3/L</math>); neutrophil percentage (60 %); lymphocyte percentage (40 %); and haemoglobin (7.6 g/dL).</p> <p>24-Mar-2010: blood glucose (18.88 mmol/L); blood pH (6, normal range: 7.38 - 7.42); and blood glucose (9.055 mmol/L).</p> <p>25-Mar-2010: body temperature (37.9° C); blood glucose (9.055 mmol/L); blood pressure (100/70 mmHg); heart rate (results: 106 per minute); and respiratory rate (results: 32 per minute).</p> <p>26-Mar-2010: Blood pH (venous 8.0, normal range: 7.38 - 7.42); blood glucose (10.77mmol/L).</p> <p>27-Mar-2010: Blood glucose (13.33 mmol/L)</p> <p>On 27-Mar-2010 the patient died. The cause of death was reported as diabetic coma, coma acidotic, malaria and meningeal disorder.</p> <p>The investigator considered there was not a reasonable possibility that the event was related to the study</p> |
|-------------------------------------------------------------------------------------------------------------------------------------------------------------------------------------------------------------------------------------------------------------------------------------------------------------------------------------------------------------------------------------------------------------------------------------------------------------------------------------------------------------------------------------------------------------------------------------------------------------------------------------------------------------------------------------------------------------------------------------------------------------------------------------------------------------------------------------------------------------------------------------------------------------------------------------------------------------------------------------------------------------------------------------------------------------------------------------------------------------------------------------------------------------------------------------------------------------------------------------------------------------------------------------------------------------------------------------------------------------------------------------------------------------------------------------------------------------------------------------------------------------------------------------------------------------------------------------------------------------------------------------------------------------------------------------------------------------------------------------------------------------------------------------------------------------------------------------------------------------------------------------------------------------------------------------------------------------------------------------------------------------------------------------|



medication.

The relevant medical history of this 65 year old woman included flank pain on exertion, right atrial dilatation, epigastric pain and peptic ulcer syndrome

She received **ivermectin** on 20 August 2010.

On 22-Oct-2010, she experienced abdominal pain and asthenia and self medicated with an unspecified herbal therapy.

On 28-Oct-2010, the patient's condition was worsening and she was hospitalized. She was presenting fever, dizziness and painful micturition. Laboratory tests showed a haemoglobin level of 8.6 g/dL and trophozoite of plasmodium in a blood smear.

29-Oct-2010 test results: Widal test - TO 1/20 TH 1/40 (normal range 0-0); haemoglobin (results: 8.6 g/dL); urine analysis (microscopy and gram coloration: Gram + cocci, 5-10 WBC/Field (normal range 0) 1-5 epithelial cells (normal range 0)); blood smear test (1 trophozoite/100 field (normal range 0/100 field)); and white blood cell count (1700/ mm<sup>3</sup>).

Treatment was started on 28-Oct-2010 with quinine and paracetamol, to which ceftriaxone, gentamycin, metronidazole were added on 29-Oct-2010. Blood transfusion was also given on 30-Oct-2010.

On 31-Oct-2010, the patient died. The cause of death was reported as septicemia.

The investigator considered there was not a reasonable possibility that the event was related to the study medication.

The past medical history of this 70 year old man included bronchial asthma.

He received **moxidectin** on 3 April 2010.

He started productive cough with dyspnoea on 07-Aug-2010. Physical examination on 07-Aug-2010 found presence of crackles and rhonchi all over the lung associated with tachycardia, fever and conjunctival hyperemia. Acute asthmatic attack (asthma) was diagnosed.

On 09-Aug-2010, the patient was hospitalized in the reference hospital.

Test results from 09-Aug-2010: blood bilirubin (Urobilinogen 33 mmol/L (normal less than 16 mmol/L)); urine ketone body ((Cetonuria) 1.5 mmol/L (normal - nil)); lymphocyte count (0.44 x10<sup>9</sup>/L); neutrophil count (11.06 x10<sup>9</sup>/L).

Treatment received included: salbutamol spray, hydrocortisone and artropine started on 07-Aug-2010, and aminophylline and erythromycin started on 08-Aug-2010.

He died on 11-Aug-2010. The cause of death was reported as asthma.

The investigator considered there was not a reasonable possibility that the event was related to the study medication.

The reported past medical history of this 60 year old woman did not include urinary incontinence and existence of a vesico vaginal fistula. She gave birth to the last child approximately 5 years before her death.

She received **moxidectin** on 24 November 2009.

She underwent a vesico-vaginal fistular surgical repair on 19-Jan-2010. Bloody urine was observed following the procedure which continued until 21-Jan-2010. Abdominal distension was observed preceded by difficulty breathing, gasping and finally death. The patient's blood pressure declined during this period. The patient received ampicillin IV (post operative) starting on 19-Jan-2010, and chloramphenicol IV and flagyl IV were started on 21-Jan-2010.

14-Jan-2010 test results: haematocrit (33 %) and haemoglobin (11 g/dL).

19-Jan-2010 test results: haemoglobin (9.6 g/dL); haematocrit (29 %); blood pressure (130/80 mmHg).

20-Jan-2010 test results: blood pressure 130/80 mmHg.

21-Jan-2010 test results blood pressure 90/50 mmHg and later in day 80/40 mm Hg.

The patient died on 21-Jan-2010. The cause of death was reported as peritonitis and cardiac arrest.

The investigator considered there was not a reasonable possibility that the event was related to the study medication.

### 2.3.3 Dependency of Mazzotti reactions on pre-treatment skin microfilariae density

The subsequent figures show the percentage of participants with Mazzotti reactions overall and by highest grade experienced across all participants and by pre-treatment SmfD in consideration of the known dependency of post-ivermectin MAZ on pre-treatment SmfD.

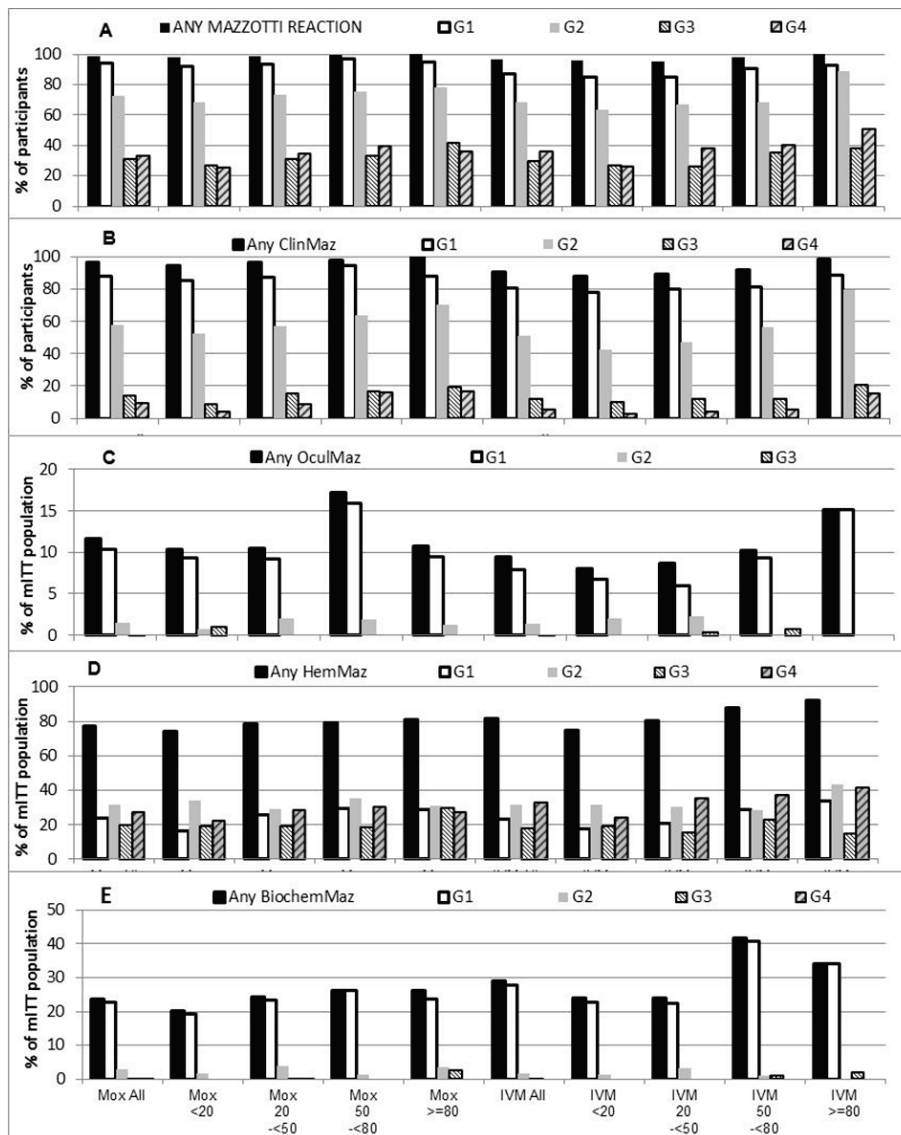

**Figure S 4 Percentage of participants overall and by skin microfilariae density pre-treatment with at least one MAZ of any grade and by highest grade experienced. (A) Any type of MAZ, (B) any type of clinical MAZ, (C) any type of ocular MAZ, (D) any type of haematological MAZ, (E) any type of biochemical MAZ.**

Legend: ClinMaz: Clinical Mazzotti reaction, OcularMaz: ocular Mazzotti reaction, HemMaz: haematological Mazzotti reaction, BiochemMaz: serum biochemical Mazzotti reactions, ANY: Mazzotti reaction of any grade; G1, G2, G3, G4: Highest experienced grade was grade 1, 2, 3, 4, respectively. Since an individual participant may have experienced more than one type of MAZ, the % of participants in individual MAZ cluster/group/grade categories is not necessarily identical to the % of participants at a higher level of MAZ cluster/group/grade category.

Mox: moxidectin, IVM: ivermectin. <20, 20-<50, 50-<80, ≥80: pretreatment SmfD in mf/mg skin. Number of participants with pre-treatment skin microfilaria density of <20, 20 to <50, 50 to <80 and ≥80 was 281, 456, 157 and 84, respectively in the moxidectin and 150, 183, 108 and 53 in the ivermectin treatment arm.

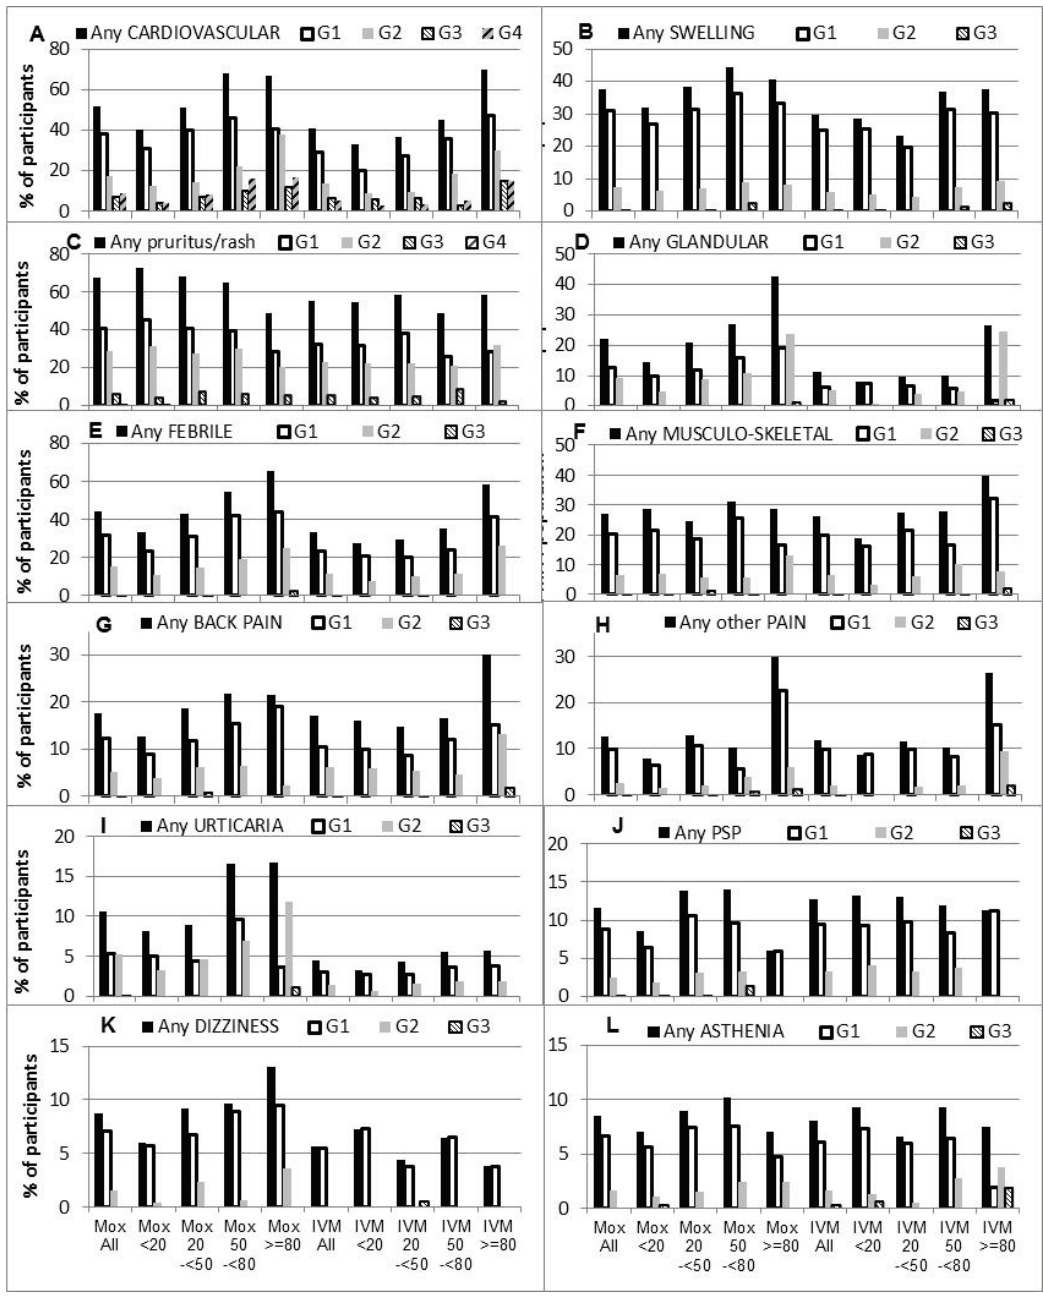

**Figure S 5 Percentage of participants overall and by intensity of infection pre-treatment with at least one clinical MAZ of any grade and by highest grade experienced for the specified clinical MAZ group.**

Legend: see Figure S4, PSP peripheral sensory phenomena.

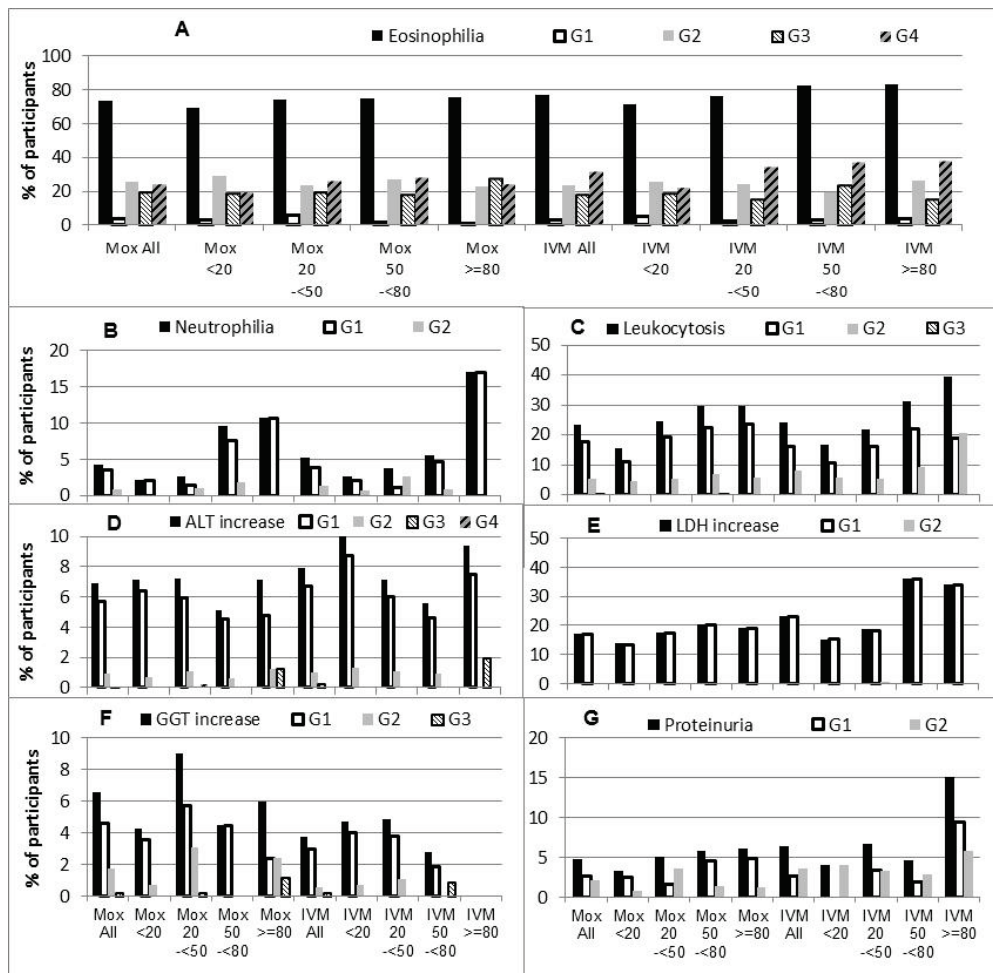

**Figure S 6 Percentage of participants overall and by intensity of infection pre-treatment with the specified hematological or serum biochemical MAZ by highest grade experienced**

Legend: see Figure S4

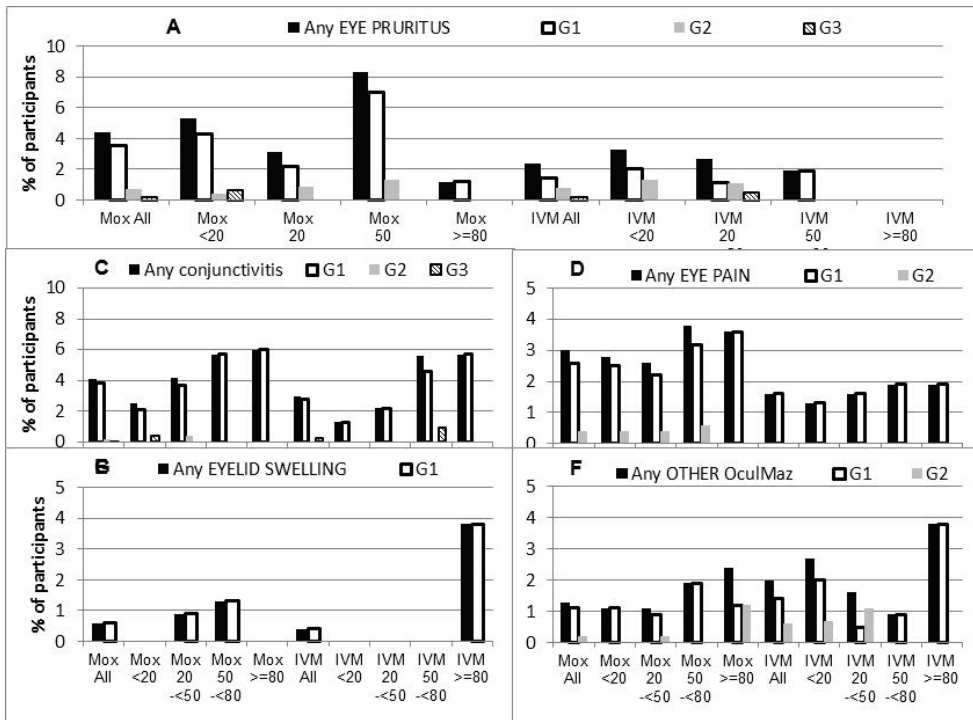

**Figure S 7 Percentage of participants overall and by intensity of infection pre-treatment with the specified types of ocular MAZ of any grade and by highest grade experienced**

Legend: see Figure S4, Any other ocular MAZ includes ocular discomfort, tearing/watery eyes, blurred vision, photophobia and visual acuity. The relatively high prevalence of other ocular MAZ among those with  $\geq 80$  mf/mg treated with ivermectin is due to tearing/watery eyes.

## 2.4 Exploratory endpoint: Effect on intestinal helminths

Intestinal helminths were only an exploratory endpoint. While the data for the primary and secondary endpoints were 100% source data verified, this was not the case for intestinal helminths.

Arithmetic mean based egg reduction rate is the WHO recommended method for quantifying drug efficacy<sup>13</sup> and provided together with cure rates in Table S16.

**Table S 19: Cure rate and egg reduction rate across all sites for hookworm, roundworm and whipworm**

| ERR <sup>1</sup>        | Moxidectin                                   |                                        |               | Ivermectin                          |                                        |               |
|-------------------------|----------------------------------------------|----------------------------------------|---------------|-------------------------------------|----------------------------------------|---------------|
|                         | EPG <sub>AM</sub> pre-treatment <sup>2</sup> | EPG <sub>AM</sub> at Month 1           | ERR (%)       | EPG <sub>AM</sub> pre-treatment     | EPG <sub>AM</sub> at month 1           | ERR (%)       |
| Hookworm                | 564                                          | 109                                    | 81            | 764                                 | 419                                    | 45            |
| Roundworm               | 386                                          | 11                                     | 97            | 79                                  | 0                                      | 100           |
| Whipworm                | 1409                                         | 7                                      | 99            | 1133                                | 0                                      | 100           |
| Cure rates <sup>3</sup> | No infected pre-treatment <sup>4</sup>       | No with undetectable infection Month 1 | Cure rate (%) | Infected pre-treatment <sup>4</sup> | No with undetectable infection Month 1 | Cure rate (%) |
| Hookworm                | 472                                          | 222                                    | 47            | 245                                 | 69                                     | 28            |
| Roundworm               | 34                                           | 33                                     | 97            | 7                                   | 7                                      | 100           |
| Whipworm                | 11                                           | 10                                     | 91            | 5                                   | 5                                      | 100           |

<sup>1</sup> ERR = (EPG<sub>AM</sub> pre-treatment – EPG<sub>AM</sub> at Month 1 visit) / EPG<sub>AM</sub> pre-treatment \* 100

<sup>2</sup> EPG eggs/gram faeces, EPG<sub>AM</sub> Arithmetic mean EPG.

<sup>3</sup> (Number of participants with epg >0 pre-treatment and epg = 0 at Month 1 follow up visit) / Number of participants with epg >0 pre-treatment \* 100

<sup>4</sup> Number lower than those with infection detected pre-treatment since all participants who received mebendazole between screening and month 1 helminth evaluation are excluded from the analysis

Olliaro et al. suggested that the utility of two different individual data based methods for quantifying drug response be examined: (a) the distribution of proportions cured, with partial response (decrease in egg/g faeces) or no response (no change or increase in EPG) and (b) the centile distribution of individual egg reduction rates (ERRic).<sup>14</sup> The analysis of the data for hookworm, for which sufficient individual data were available is shown in Figure S 7.

**Figure S 8 Individual data based analysis of response of hookworm infection to moxidectin and ivermectin**

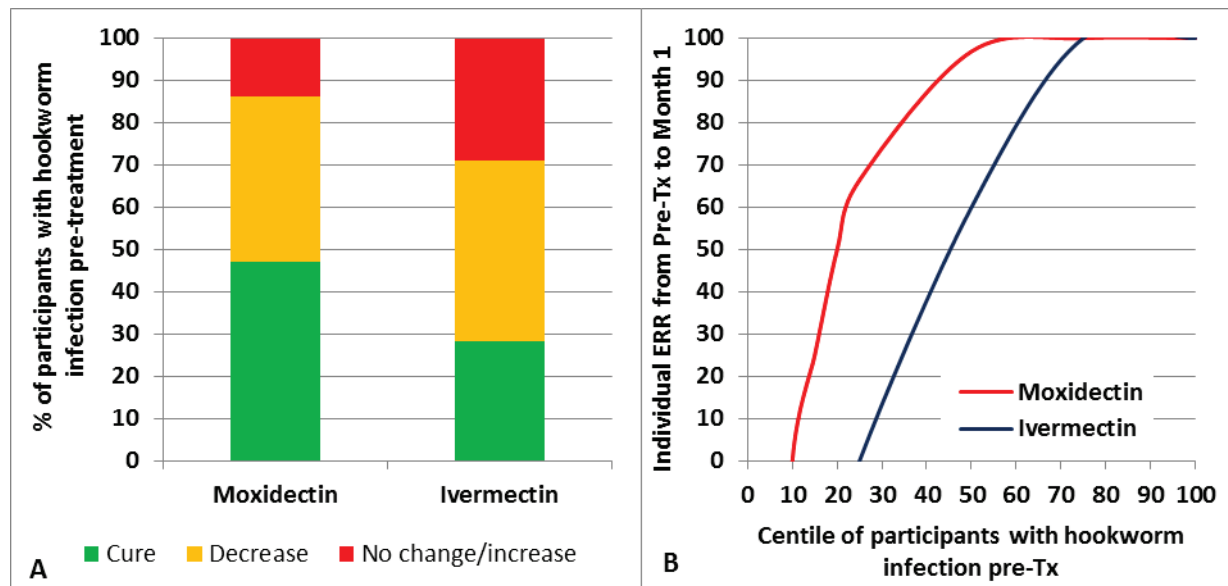

A. Percentage of participants with no change or increase in hookworm eggs/gram faeces (EPG), decrease in EPG or undetectable EPG (cure) 1 months post-treatment. B Centiles of participants by hookworm EPG reduction rate.

## 3 Classification of Response to ivermectin in previous studies

The table below provides an overview of criteria used in studies assessing adequate/expected/normal response vs. a lower level of response. Responses indicating a low sensitivity to the embryostatic effect of ivermectin are referred to frequently as suboptimal response (SOR)<sup>15</sup>, responses indicating a low sensitivity to the 'microfilaricidal' effect of ivermectin have been referred to as SOMR<sup>12</sup>.



In addition, the results of a meta-analysis of 26 clinical and field studies of skin microfilariae levels after a single dose of ivermectin are included (for an analyses of these data quantifying inter-subject variability in response as a basis for detecting suboptimal response to ivermectin, see Churcher et al.<sup>16</sup>).

**Table S 20: Criteria in previous studies for classification of response to ivermectin treatment based on skin microfilariae levels**

| Time post-treatment                              | Evaluation unit<br>Response characterization                                                                                   | Skin mf density criteria                                                                                     | Quantitation of SmfD | Ivermectin treatment history<br>Reference                              |
|--------------------------------------------------|--------------------------------------------------------------------------------------------------------------------------------|--------------------------------------------------------------------------------------------------------------|----------------------|------------------------------------------------------------------------|
| 8 days<br>90 days<br>365 days                    | Individual<br>Adequate response:<br>Adequate response:<br>Adequate response:                                                   | < 40% of pre-treatment<br>≤ 6% of pre-treatment<br>≤ 40% of pre-treatment                                    | mf/4mg, 4 snips      | None (first treatment)<br>Awadzi et al. <sup>15</sup>                  |
| 90 days<br>180 days<br>180 days                  | Community<br>Expected response:<br>Normal response:<br>Poor response, alarming response:                                       | <6% of pre-treatment<br><20% of pre-treatment<br>>30 % of pre-treatment                                      | mf/snips, 2 snips    | ≥ 6 rounds of CDTI<br>Osei-Atweneboana et al. <sup>17</sup>            |
| 364 days<br>364 days<br>364 days                 | Community<br>Good response:<br>Intermediate response:<br>Poor response:                                                        | < pre-treatment<br>≈ pre-treatment<br>> pre-treatment                                                        | mf/snips, 2 snips    | ≥ 6 rounds of CDTI<br>Osei-Atweneboana et al. <sup>18</sup>            |
| 1 week<br>1-2 months<br>2-10 months<br>12 months | Meta-analysis of 26 clinical and field studies<br>Model predicted:<br>Model predicted:<br>Model predicted:<br>Model predicted: | <6% of pre-treatment GM<br>1 % of pre-treatment GM<br>< 20% of pre-treatment GM<br>≈ 20% of pre-treatment GM |                      | None (first treatment)<br>Basanez et al. <sup>19</sup> (meta-analysis) |

CDTI: Annual community directed treatment with ivermectin, GM Geometric Mean

#### 4 References

- (1) Awadzi K, Dadzie KY, DeSole G., Remme J. Reactions to ivermectin treatment in onchocerciasis patients. Acta Leiden. 1990;59(1-2):193-9.
- (2) Hero M, Bird AC, Awadzi K. Quantification of the ocular reactions to microfilaricides in the chemotherapy of onchocerciasis. Eye (Lond). 1992;6 ( Pt 1):93-6.
- (3) Awadzi K. The chemotherapy of onchocerciasis II. Quantitation of the clinical reaction to microfilaricides. Ann Trop Med Parasitol. 1980 Apr;74(2):189-97.
- (4) Francis H, Awadzi K, Ottesen EA. The Mazzotti reaction following treatment of onchocerciasis with diethylcarbamazine: clinical severity as a function of infection intensity. Am J Trop Med Hyg. 1985 May;34(3):529-36.
- (5) Baraka OZ, Mahmoud BM, Ali MM, Ali MH, el Sheikh EA, Homeida MM, et al. Ivermectin treatment in severe asymmetric reactive onchodermatitis (sowda) in Sudan. Trans R Soc Trop Med Hyg. 1995 May;89(3):312-5.
- (6) Awadzi K, Opoku NO, Addy ET, Quartey BT. The chemotherapy of onchocerciasis. XIX: The clinical and laboratory tolerance of high dose ivermectin. Trop Med Parasitol. 1995 Jun;46(2):131-7.
- (7) Bryceson AD, Warrell DA, Pope HM. Dangerous reactions to treatment of onchocerciasis with diethylcarbamazine. Br Med J. 1977 Mar 19;1(6063):742-4.
- (8) Awadzi K, Gilles HM. Diethylcarbamazine in the treatment of patients with onchocerciasis. Br J Clin Pharmacol. 1992 Oct;34(4):281-8.
- (9) Remme J, Baker RH, DeSole G, Dadzie KY, Walsh JF, Adams MA, et al. A community trial of ivermectin in the onchocerciasis focus of Asubende, Ghana. I. Effect on the microfilarial reservoir and the transmission of *Onchocerca volvulus*. Trop Med Parasitol. 1989 Sep;40(3):367-74.
- (10) Albiez EJ, Büttner D, Duke BO. Diagnosis and extirpation of nodules in human onchocerciasis. Trop Med Parasitol. 1988 Dec;39 Suppl 4:331-46.
- (11) Fischer P, Kipp W, Bamuhiga J, Binta-Kahwa J, Kiefer A, Buttner DW. Parasitological and clinical characterization of *Simulium neavei*-transmitted onchocerciasis in western Uganda. Trop Med Parasitol. 1993 Dec;44(4):311-21.
- (12) Awadzi K, Opoku NO, Attah SK, Lazdins-Helds J, Kuesel AC. A Randomized, Single-Ascending-Dose, Ivermectin-Controlled, Double-Blind Study of Moxidectin in *Onchocerca volvulus* Infection. PLoS Supplemental Appendix to: Opoku et al. Single dose moxidectin versus ivermectin for *Onchocerca volvulus* infection in Ghana, Liberia, and the Democratic Republic of the Congo: a randomised, controlled, double-blind phase 3 trial

- (13) World Health Organization. Assessing the efficacy of anthelmintic drugs against schistosomiasis and soil-transmitted helminthiases. Geneva: World Health Organization; 2013.
- (14) Olliaro PL, Diawara A, Speich B, Keiser J, Halpenny C, Albonico M, et al. Comparing group means and individual responses to treatment of soil-transmitted nematodes with benzimidazole drugs: a pooled analysis of individual patient data. Annual Meeting ASTMH (<https://www.astmh.org/ASTMH/media/Documents/ASTMH2014AbstractBookFINAL.pdf>) Abstract 642, 194. 2014.
- (15) Awadzi K, Boakye DA, Edwards G, Opoku NO, Attah SK, Osei-Atweneboana MY, et al. An investigation of persistent microfilaridermias despite multiple treatments with ivermectin, in two onchocerciasis-endemic foci in Ghana. *Ann Trop Med Parasitol*. 2004 Apr;98(3):231-49.
- (16) Churcher TS, Pion SD, Osei-Atweneboana MY, Prichard RK, Awadzi K, Boussinesq M, et al. Identifying sub-optimal responses to ivermectin in the treatment of River Blindness. *Proc Natl Acad Sci U S A*. 2009 Sep 29;106(39):16716-21.
- (17) Osei-Atweneboana MY, Eng JK, Boakye DA, Gyapong JO, Prichard RK. Prevalence and intensity of *Onchocerca volvulus* infection and efficacy of ivermectin in endemic communities in Ghana: a two-phase epidemiological study. *Lancet*. 2007 Jun 16;369(9578):2021-9.
- (18) Osei-Atweneboana MY, Awadzi K, Attah SK, Boakye DA, Gyapong JO, Prichard RK. Phenotypic Evidence of Emerging Ivermectin Resistance in *Onchocerca volvulus*. *PLoS Negl Trop Dis*. 2011;5(3):e998.
- (19) Basanez MG, Pion SD, Boakes E, Filipe JA, Churcher TS, Boussinesq M. Effect of single-dose ivermectin on *Onchocerca volvulus*: a systematic review and meta-analysis. *Lancet Infect Dis*. 2008 May;8(5):310-22. doi: S1473-3099(08)70099-9 [pii];10.1016/S1473-3099(08)70099-9 [doi].
